## Laboratory evolution of a *Saccharomyces cerevisiae* x *S. eubayanus* hybrid under simulated lager-brewing conditions: genetic diversity and phenotypic convergence

Arthur R. Gorter de Vries<sup>1</sup>, Maaïke A. Voskamp<sup>1</sup>, Aafke C. A. van Aalst<sup>1</sup>, Line H. Kristensen<sup>1</sup>, Liset Jansen<sup>1</sup>, Marcel van den Broek<sup>1</sup>, Alex N. Salazar<sup>2</sup>, Nick Brouwers<sup>1</sup>, Thomas Abeel<sup>2,3</sup>, Jack T. Pronk<sup>1</sup> and Jean-Marc G. Daran<sup>1,\*</sup>

1. Department of Biotechnology, Delft University of Technology, Delft, The Netherlands
2. Delft Bioinformatics Lab, Delft University of Technology, Delft, The Netherlands
3. Broad Institute of MIT and Harvard, Boston, Massachusetts, USA

\* Corresponding author: Dr Jean-Marc Daran, Delft University of Technology, Department of Biotechnology, Julianalaan, 67, 2628BC delft, The Netherlands. Phone:+31(0)15 278 2412. email: [j.g.daran@tudelft.nl](mailto:j.g.daran@tudelft.nl)

## Abstract

*Saccharomyces pastorianus* lager-brewing yeasts are domesticated hybrids of *S. cerevisiae* x *S. eubayanus* that display extensive inter-strain chromosome copy number variation and chromosomal recombinations. It is unclear to what extent such genome rearrangements are intrinsic to the domestication of hybrid brewing yeasts and whether they contribute to their industrial performance. Here, an allodiploid laboratory hybrid of *S. cerevisiae* and *S. eubayanus* was evolved for up to 418 generations on wort under simulated lager-brewing conditions in six independent sequential batch bioreactors. Characterization of 55 single-cell isolates from the evolved cultures showed large phenotypic diversity and whole-genome sequencing revealed a large array of mutations. Frequent loss of heterozygosity involved diverse, strain-specific chromosomal translocations, which differed from those observed in domesticated, aneuploid *S. pastorianus* brewing strains. In contrast to the extensive aneuploidy of domesticated *S. pastorianus* strains, the evolved isolates only showed limited (segmental) aneuploidy. Specific mutations could be linked to calcium-dependent flocculation, loss of maltotriose utilisation and loss of mitochondrial activity, three industrially relevant traits that also occur in domesticated *S. pastorianus* strains. This study indicates that fast acquisition of extensive aneuploidy is not required for genetic adaptation of *S. cerevisiae* x *S. eubayanus* hybrids to brewing environments. In addition, this work demonstrates that, consistent with the diversity of brewing strains for maltotriose utilization, domestication under brewing conditions can result in loss of this industrially relevant trait. These observations have important implications for the design of strategies to improve industrial performance of novel laboratory-made hybrids.

## Introduction

*Saccharomyces* yeasts are popular eukaryotic models for studying genome hybridisation, chromosome (mis)segregation and aneuploidy (Botstein, et al. 1997; Sheltzer, et al. 2011). The genus *Saccharomyces* arose between 10 and 20 million years ago and currently comprises eight described species, as well as interspecies hybrids (Liti, et al. 2006; Hittinger 2013; Naseeb, et al. 2017). Absence of a prezygotic barrier between *Saccharomyces* species facilitates hybridization, although spore viabilities of the resulting hybrids is typically well below 10 % (Liti, et al. 2006; Hittinger 2013; Naseeb, et al. 2017). Several interspecies *Saccharomyces* hybrids are tightly associated with domestication in industrial processes. *S. pastorianus* lager-brewing yeasts are domesticated *S. cerevisiae* x *S. eubayanus* hybrids (Libkind, et al. 2011). Double and triple hybrids between *S. cerevisiae*, *S. kudriavzevii* and *S. uvarum* are closely associated with wine fermentation (González, et al. 2006; Querol and Bond 2009; Marsit and Dequin 2015). *S. bayanus* cider fermentation yeasts are domesticated *S. uvarum* X *S. eubayanus* hybrids (Naumov, et al. 2001). Reconstruction of the corresponding *Saccharomyces* hybrids in the laboratory showed improved performance, relative to the parental species. For example, laboratory-made *S. cerevisiae* x *S. eubayanus* hybrids combined sugar utilisation characteristics of *S. cerevisiae* and the superior performance at low temperatures of *S. eubayanus* (Hebly, et al. 2015; Krogerus, et al. 2017). Similarly, hybrids of *S. cerevisiae*, *S. kudriavzevii* and *S. uvarum* combined traits of their parental species relevant to industrial wine fermentation, such as flocculence, sugar utilisation kinetics, stress tolerance and aroma production (Coloretti, et al. 2006; Lopandic, et al. 2016).

The relevance of laboratory hybridization of *Saccharomyces* species extends beyond reconstruction of existing, domesticated hybrids. The ability of hybridisation to generate extensive phenotypic diversity has raised interest in the development of novel *Saccharomyces* hybrids for specific industrial processes (Krogerus, et al. 2017). For example, an *S. cerevisiae* x *S. paradoxus* hybrid produced high concentrations of aromatic compounds that are of interest for wine making

(Bellon, et al. 2011). Hybrids between *S. cerevisiae* and *S. arboricola* or *S. mikatae* were able to utilize the sugars in wort at low temperatures and produced particularly aromatic beer (Nikulin, et al. 2017). Laboratory hybrids of *S. cerevisiae* and *S. kudriavzevii* or *S. mikatae* yielded xylose-consuming strains with high inhibitor tolerance for 2<sup>nd</sup> generation biofuel production (Peris, et al. 2017).

The allo euploid genomes of laboratory hybrids of *Saccharomyces* species strongly differ from the extremely aneuploidy genomes of the domesticated strains used in traditional industrial processes. For example, the genomes of *S. pastorianus* lager-brewing yeasts contain between 45 and 79 chromosomes (Van den Broek, et al. 2015; Okuno, et al. 2016), a degree of aneuploidy that is not observed elsewhere in the *Saccharomyces* genus (Gorter de Vries, Pronk, et al. 2017). The current consensus is that all *S. pastorianus* strains have evolved from a single, common ancestor *S. cerevisiae* x *S. eubayanus* hybrid by centuries of domestication and strain improvement in brewing-related environments (Okuno, et al. 2016). However, it remains unclear when and how domestication resulted in the extensive chromosome copy number variations and phenotypic diversity of current *S. pastorianus* strains.

Hybrid genomes have a well-documented increased tendency to become aneuploid due to an increased rate of chromosome missegregation during mitosis and/or meiosis (Chambers, et al. 1996; Liti, et al. 2006). Aneuploidy reduces the efficiency of sporulation and can thereby complicate genetic modification, impeding breeding and targeted strain improvement (Santaguida and Amon 2015; Gorter de Vries, de Groot, et al. 2017). In evolutionary contexts, aneuploidy is generally seen as a transient adaptation mechanism, whose positive impacts are eventually taken over by more parsimonious mutations (Yona, et al. 2012). When grown mitotically, sporulated hybrid strains were prone to further chromosome missegregation resulting in more extensive chromosome copy number variations (Lopandic, et al. 2016). Even genomes of *Saccharomyces* hybrids that had not undergone meiosis displayed increased rates of mitotic chromosome missegregation during mitosis (Delneri, et al. 2003). Indeed, when evolved in lignocellulosic hydrolysates, cultures of *S. cerevisiae* X *S.*

*kudriavzevii* and *S. cerevisiae* x *S. mikatae* hybrids exhibited segmental and full-chromosome aneuploidy after only 50 generations (Peris, et al. 2017). Similarly, when evolved under wine fermentation conditions, *S. cerevisiae* x *S. kudriavzevii* hybrids displayed extensive genome reorganisations that led to a significant reduction of their genome content (Pérez Través, et al. 2014).

Genetic instability of hybrid genomes could be detrimental to stable, robust industrial performance. Therefore, to assess industrial applicability of new hybrids generated in the laboratory, it is important to determine their genome stability under industrially relevant conditions. Moreover, laboratory evolution under simulated industrial conditions can increase understanding of the selective pressures that shaped the genomes of domesticated microorganisms (Bachmann, et al. 2012; Gibbons, et al. 2012; Gibbons and Rinker 2015).

The goal of the present study was to investigate how a previously constructed allodiploid *S. cerevisiae* x *S. eubayanus* hybrid (Hebly, et al. 2015) evolves under simulated lager-brewing conditions, with a specific focus on genome dynamics and on acquisition or loss of brewing-related phenotypes. To mimic successive lager beer fermentation processes, the hybrid strain was subjected to sequential batch cultivation on industrial wort, in six independent bioreactor setups. After up to 418 generations, the genotypic and phenotype diversity generated in these laboratory evolution experiments was analysed by characterization of 55 single-cell isolates. After whole-genome resequencing of each isolate using 150 bp paired-end reads, sequence data were mapped to high-quality reference genomes of the parental strains to identify genomic changes. Phenotypic analysis of the isolates focused on the ability to utilise maltotriose, flocculation and the respiratory capacity. We interpreted these results in the context of the domestication history of *S. pastorianus* brewing strains as well as in relation to genome stability and industrial application of newly generated *Saccharomyces* hybrids.

## Results

### Simulating domestication under lager-brewing conditions in sequential batch bioreactors

Industrial lager brewing involves batch cultivation of *S. pastorianus* on wort, an extract from malted barley, at temperatures between 7 and 15 °C. After a brief initial aeration phase to enable oxygen-dependent biosynthesis of unsaturated fatty acids and sterols (Andreasen and Stier 1953; Gibson, et al. 2007), brewing fermentations are not aerated or stirred, leading to anaerobic conditions during the main fermentation (Briggs, et al. 2004). To simulate domestication under industrial lager-brewing conditions, a laboratory evolution regime was designed in which the laboratory-made *S. cerevisiae* x *S. eubayanus* hybrid IMS0408 was grown at 12 °C in sequential batch bioreactors on industrial wort. As in industrial brewing, each cultivation cycle was preceded by an aeration phase, after which cultures were incubated without sparging or stirring until a decline of the CO<sub>2</sub> production indicated a cessation of sugar consumption. The bioreactors were then partially emptied, leaving 7 % of the culture volume as inoculum for the next aeration and fermentation cycle, which was initiated by refilling the reactor with sterile wort (Figure 1A and 1B). To mimic the low sugar concentrations during early domestication of *S. pastorianus* (Meussdoerffer 2009), parallel duplicate experiments at 12 °C were not only performed with full-strength 17 °Plato wort ('High Gavity', experiments HG12.1 and HG12.2), but also with three-fold diluted wort ('Low Gavity', experiments LG12.1 and LG12.2). To enable a larger number of generations during 4 months of operation, additional duplicate experiments on three-fold diluted wort were performed at 30 °C (LG30.1 and LG30.2).

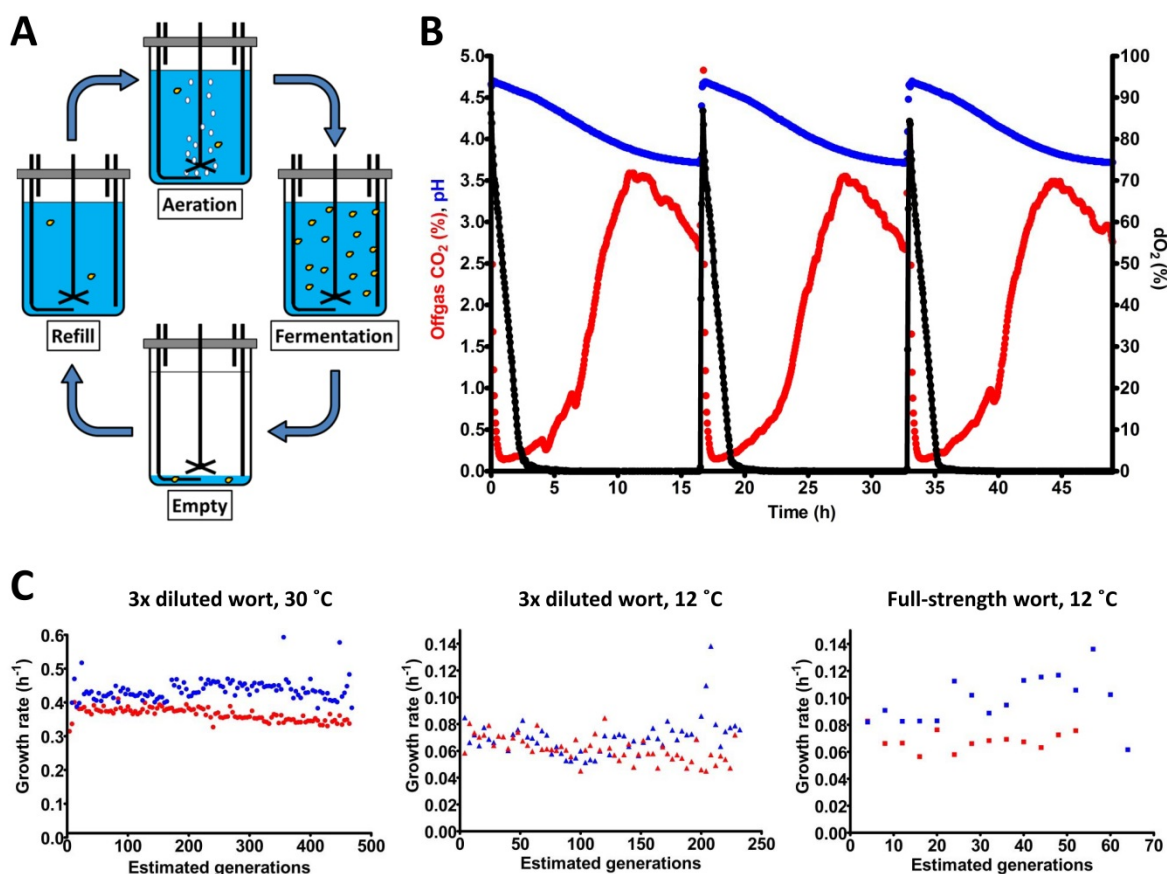

**Figure 1: Laboratory evolution mimicking the domestication of lager-brewing yeast.** The *S. cerevisiae* x *S. eubayanus* laboratory hybrid IMS0408 was grown in duplicate sequential batch bioreactors in 3-fold diluted wort at 30 °C (LG30.1 and LG30.2) and at 12 °C (LG12.1 and LG12.2), and in full-strength wort at 12 °C (HG12.1 and HG12.2). (A) Experimental design for simulated sequential lager-beer brewing cycles. Each cycle consisted of four phases: (i) (re)filling of the fermenter with fresh medium up to a total volume of 100 mL, (ii) aeration at 200 mL/min while stirring at 500 RPM, (iii) a batch fermentation phase without sparging or stirring, while flushing the bioreactor headspace with N<sub>2</sub> to enable accurate analysis of CO<sub>2</sub> production and (iv) removal of broth, leaving 7 mL to inoculate the next cycle. (B) Fermentation profiles of three consecutive cycles from experiment LG30.1, performed at 30 °C in 3-fold diluted wort. Percentage of CO<sub>2</sub> in the off gas, culture pH and dissolved oxygen (dO<sub>2</sub>) concentration are indicated by red, blue and black symbols, respectively. Due to the lack of stirring and sparging, CO<sub>2</sub> was slowly released by the medium; emptying of the reactor was initiated when the offgas CO<sub>2</sub> concentration dropped to 70 % of its initial value as off-line analyses indicated that, at this point, all fermentable sugars had been consumed (C) Specific growth estimated from CO<sub>2</sub> production profiles during each cycle of the evolution lines. LG30.1 (blue circles) and LG30.2 (red circles) were grown on 3-fold diluted wort at 30 °C; LG12.1 (blue triangles) and LG12.2 (red triangles) were grown on 3-fold diluted wort at 12 °C. HG12.1 (blue squares) and HG12.2 (red squares) were evolved in full-strength wort at 12 °C. Since lack of sparging and stirring precluded exact estimates of specific growth rates, the calculated values should be taken as indicative.

Concentration of the wort and temperature strongly affected the length of the fermentation cycles, which was 17 h for LG30.1 and LG30.2, 93 h for LG12.1 and LG12.2 and 205 h for HG12.1 and HG12.2. Experiments LG30.1 and LG30.2 involved 117 and 118 batch cycles, respectively, LG12.1 and LG12.2 covered 58 and 57 cycles, respectively, and HG12.1 and HG12.2 covered 13 and 16 cycles, respectively. At the inoculum size of 7 % of the total culture volume, each cycle corresponded to approximately 4 generations. Specific growth rates, estimated from CO<sub>2</sub> production rates during the exponential growth phase of the batch cycles, were not significantly different during the first and the last five cycles of each experiment (Student's t-test,  $p > 0.05$ ). Average specific growth rates were  $0.35 \pm 0.02 \text{ h}^{-1}$  for LG30.1,  $0.42 \pm 0.03 \text{ h}^{-1}$  for LG30.2,  $0.070 \pm 0.013 \text{ h}^{-1}$  for LG12.1,  $0.062 \pm 0.009 \text{ h}^{-1}$  for LG12.2,  $0.068 \pm 0.007 \text{ h}^{-1}$  for HG12.1 and  $0.098 \pm 0.018 \text{ h}^{-1}$  for HG12.2. While the initial specific growth rate was clearly higher at 30 °C than at 12 °C, initial growth rates on diluted and full-strength wort were not significantly different. However, CO<sub>2</sub> production from sugars continued much longer in full-strength wort. During brewing fermentation, depletion of nitrogen sources and oxygen limit biomass formation. Complete sugar conversion therefore depends on growth-independent alcoholic fermentation which, apparently, was much slower in cultures grown on full-strength wort. At the end of each evolution experiment, culture samples were streaked on YPD agar and 5 single colonies were isolated for each culture. For experiments LG12.1 and LG12.2, isolates were also made from intermediate samples after 29 cycles. Evolution lines LG30.2 and LG12.2 developed flocculence and isolates from these lines had two distinct colony morphologies: about half of the colonies were elevated and conically-shaped, while the other colonies shared the flat morphology of IMS0408. For each of these lines, five random colonies of each morphology were selected.



### **Prolonged growth under simulated brewing conditions did not cause large ploidy changes**

Six independent sequential batch fermentation experiments under simulated brewing conditions, covering 52 to 468 generations, yielded 55 isolates. Staining with the DNA-binding fluorescent dye SYTOX Green and flow cytometry indicated genome sizes of the isolates between 17.6 and 23.5 Mbp (Supplementary table S1). These values did not differ significantly from the  $21.3 \pm 1.9$  Mbp genome size measured for the parental laboratory hybrid IMS0408 and therefore indicated the absence of large changes in genome content such as whole-genome duplications. For a detailed genotypic analysis, the genomes of the 55 isolates were sequenced using 150 bp pair-end reads with 101- to 189-fold coverage. A high quality-reference genome was constructed by combining the chromosome-level contigs from assemblies of CEN.PK113-7D and CBS12357 generated with nanopore technology, including mitochondrial genome sequences (Salazar, et al. 2017; Brickwedde, et al. 2018).

Copy number analysis revealed whole-chromosome aneuploidies in only 5/55 isolates (Table 1). Relative to strain IMS0408, the total chromosome number of the isolates had not changed by more than one. Isolate IMS0556 (LG30.1) had gained a copy of *Sc*CHRVIII, IMS0560 (LG30.1) had gained a copy of *Se*CHRX, IMS0565 (LG30.2) had lost *Sc*CHRXIV and gained a copy of *Se*CHRXIV, IMS0595 (LG12.1) had gained a copy of *Se*CHRVIII and IMS0606 (LG12.2) had lost a copy of *Se*CHRVIII. Read alignments to mitochondrial genome sequences were absent from 14/55 isolates, while 1 isolate showed only a partial alignment, indicating complete ( $\rho^-$ ) or partial loss ( $\rho^0$ ) of the mitochondrial genome in 15/55 strains. Loss of respiratory competence was confirmed by the observation that these 15 isolates, in contrast to IMS0408 and isolates containing a full mitochondrial genome, were unable to grow on YP-ethanol (Supplementary Figure S1).

1 **Table 1: Overview of phenotypic and genotypic changes in isolates obtained after laboratory evolution of the allodiploid laboratory hybrid IMS0408**  
 2 **under simulated lager-brewing conditions.**

| Experiment                         | GEN# <sup>1</sup> | Isolate | M <sup>2</sup> | F <sup>3</sup> | R <sup>4</sup> | M <sub>DNA</sub> <sup>5</sup> | Aneuploidy <sup>6,7</sup> | Segmental aneuploidy and loss of heterozygosity <sup>6,7</sup>                                                | SNPs <sup>6,8</sup>                                                | INDELS <sup>6,8,9</sup>                                                                |
|------------------------------------|-------------------|---------|----------------|----------------|----------------|-------------------------------|---------------------------|---------------------------------------------------------------------------------------------------------------|--------------------------------------------------------------------|----------------------------------------------------------------------------------------|
| LG12.1<br>(3x diluted wort, 12 °C) | Unevolved         | IMS0408 | +              | -              | +              |                               |                           |                                                                                                               |                                                                    |                                                                                        |
|                                    | 116               | IMS0538 | +              | -              | +              |                               |                           |                                                                                                               |                                                                    |                                                                                        |
|                                    |                   | IMS0539 | +              | -              | +              |                               |                           |                                                                                                               |                                                                    |                                                                                        |
|                                    |                   | IMS0540 | +              | -              | +              |                               |                           |                                                                                                               | <i>SeHDA2</i> <sup>A1651T</sup>                                    | <i>SeMED2</i> <sup>462+3N</sup>                                                        |
|                                    |                   | IMS0541 | +              | -              | -              | $\rho^0$                      |                           |                                                                                                               |                                                                    |                                                                                        |
|                                    |                   | IMS0542 | +              | -              | +              |                               |                           |                                                                                                               | <i>ScIQG1</i> <sup>A2069C</sup>                                    | <i>SeKEX1</i> <sup>1875-6N</sup>                                                       |
|                                    |                   | IMS0543 | +              | +              | +              |                               |                           | $\Delta Sc(YKL032C-YKL054C)$                                                                                  |                                                                    |                                                                                        |
|                                    |                   | IMS0544 | +              | +              | +              |                               |                           | $\Delta Sc(YKL032C-YKL054C)$ , $\Delta Sc::Se(YLR154C-YLR_{end})$                                             | <i>SeSAC1</i> <sup>G1093C</sup>                                    |                                                                                        |
|                                    |                   | IMS0545 | +              | +              | +              |                               |                           | $\Delta Sc(YKL032C-YKL054C)$                                                                                  |                                                                    | <i>SeNAF1</i> <sup>1404-30N,1436-30N</sup>                                             |
|                                    |                   | IMS0546 | +              | +              | -              | $\rho^-$                      |                           | $\Delta Sc(YKL032C-YKL054C)$                                                                                  |                                                                    |                                                                                        |
|                                    |                   | IMS0547 | +              | +              | +              |                               |                           | $\Delta Sc(YKL032C-YKL054C)$                                                                                  |                                                                    |                                                                                        |
|                                    | 232               | IMS0594 | +              | -              | +              |                               |                           |                                                                                                               |                                                                    | <i>SeELA1</i> <sup>230+343N</sup> , <i>SeIRA2</i> <sup>1402-1N</sup> , <i>ScFLO9</i> * |
|                                    |                   | IMS0595 | +              | -              | +              |                               | 2xSe(CHRVIII)             | $\Delta Se::Sc(YOL_{end}-YOL072W)$                                                                            |                                                                    |                                                                                        |
|                                    |                   | IMS0596 | +              | -              | +              |                               |                           |                                                                                                               | <i>SeIRA2</i> <sup>C1376A</sup> , <i>ScYER188W</i> <sup>T28A</sup> |                                                                                        |
|                                    |                   | IMS0597 | +              | -              | +              |                               |                           | $\Delta Se::Sc(YOL_{end}-YOL057W)$                                                                            | <i>SeNUP1</i> <sup>C1205T</sup> , <i>ScPDC2</i> <sup>G372A</sup>   |                                                                                        |
|                                    |                   | IMS0598 | +              | -              | +              |                               |                           |                                                                                                               | <i>SeSRT1</i> <sup>C359T</sup>                                     | <i>SeASG1</i> <sup>2488+3N</sup>                                                       |
|                                    |                   | IMS0599 | +              | +              | +              |                               |                           | $\Delta Sc(YKL032C-YKL054C)$ , $\Delta Se::Sc(YLR154C-YLR_{end})$                                             |                                                                    |                                                                                        |
|                                    |                   | IMS0600 | +              | -              | +              |                               |                           | $\Delta Se::Sc(YOL_{end}-YOL075W)$                                                                            | <i>SeMSR1</i> <sup>A853C</sup>                                     |                                                                                        |
|                                    |                   | IMS0601 | +              | +              | -              | $\rho^-$                      |                           | $\Delta Sc(YKL032C-YKL054C)$                                                                                  |                                                                    |                                                                                        |
|                                    |                   | IMS0602 | +              | +              | +              |                               |                           | $\Delta Sc(YKL032C-YKL054C)$                                                                                  |                                                                    |                                                                                        |
|                                    |                   | IMS0603 | +              | -              | +              |                               |                           | $\Delta Se::Sc(YNL_{end}-YNL123W)$ , $\Delta Se::Sc(YOL_{end}-YOL013C)$ ,<br>$\Delta Sc::Se(YOL013C-YOL006C)$ |                                                                    |                                                                                        |

3 Footnotes: A complete list of mutations is provided in Supplementary Data File 1. <sup>1</sup> Estimated number of generations prior to isolation. <sup>2</sup> Ability to utilise the  
 4 sugar maltotriose. <sup>3</sup> Flocculation during growth on liquid medium. <sup>4</sup> Respiratory competence. <sup>5</sup> Presence of the mitochondrial DNA. An empty field indicates  
 5 presence of the *S. eubayanus* mitochondrial DNA,  $\rho^-$  indicates complete loss of the mitochondrial genome and  $\rho^0$  partial loss. <sup>6</sup> Sc and Se indicate sequences  
 6 on the *S. cerevisiae* and *S. eubayanus* subgenomes, respectively. <sup>7</sup> “ $\Delta$ ” indicates deletion, “2x” indicates duplication and “::” indicates substitution. <sup>8</sup> SNPs  
 7 and INDELS are only indicated when they affected an ORF and were non synonymous. <sup>9</sup> The number of nucleotides added (+N) or removed (-N) is indicated  
 8 after the coordinate of the last unchanged nucleotide.

| Experiment                            | GEN# <sup>1</sup> | Isolate | M <sup>2</sup> | F <sup>3</sup> | R <sup>4</sup> | M <sub>DNA</sub> <sup>5</sup> | Aneuploidy <sup>6,7</sup> | Segmental aneuploidy and loss of heterozygosity <sup>6,7</sup>                             | SNPs <sup>6,8</sup>                                      | INDELS <sup>6,8,9</sup>                                           |
|---------------------------------------|-------------------|---------|----------------|----------------|----------------|-------------------------------|---------------------------|--------------------------------------------------------------------------------------------|----------------------------------------------------------|-------------------------------------------------------------------|
| LG12.2<br>(3x diluted wort, 12 °C)    | 116               | IMS0548 | +              | -              | +              |                               |                           | $\Delta$ Se::Sc(YKL <sub>end</sub> -YKL057C), $\Delta$ Sc::Se(YKL057C-YKR <sub>end</sub> ) |                                                          |                                                                   |
|                                       |                   | IMS0549 | +              | -              | -              | $\rho^-$                      |                           |                                                                                            |                                                          |                                                                   |
|                                       |                   | IMS0550 | +              | -              | -              | $\rho^-$                      |                           |                                                                                            |                                                          |                                                                   |
|                                       |                   | IMS0551 | +              | -              | -              | $\rho^-$                      |                           | $\Delta$ Sc(YCL <sub>end</sub> -YCL067C), $\Delta$ Sc(YCR039C-YCR <sub>end</sub> )         |                                                          |                                                                   |
|                                       |                   | IMS0552 | +              | -              | -              | $\rho^-$                      |                           | $\Delta$ Sc::Se(YHL <sub>end</sub> -YHL023C)                                               |                                                          |                                                                   |
|                                       | 228               | IMS0604 | +              | -              | +              |                               |                           | $\Delta$ Sc(YKL032C-YKL054C), $\Delta$ Sc::Se(YLR305C-YLR <sub>end</sub> )                 | SeBET2 <sup>G550A</sup>                                  |                                                                   |
|                                       |                   | IMS0605 | +              | -              | +              |                               |                           | $\Delta$ Sc(YKL032C-YKL054C)                                                               |                                                          |                                                                   |
|                                       |                   | IMS0606 | +              | -              | -              | $\rho^-$                      | $\Delta$ Se(CHRVIII)      | $\Delta$ Sc(YKL032C-YKL054C)                                                               | ScLRG1 <sup>C2277G</sup>                                 |                                                                   |
|                                       |                   | IMS0607 | +              | -              | +              |                               |                           | $\Delta$ Sc(YKL032C-YKL054C)                                                               |                                                          | SeFLO11*                                                          |
|                                       |                   | IMS0608 | +              | -              | -              | $\rho^-$                      |                           | $\Delta$ Sc(YKL032C-YKL054C)                                                               |                                                          |                                                                   |
| LG30.1<br>(3x diluted wort, 30 °C)    | 464               | IMS0553 | +              | -              | +              |                               |                           |                                                                                            |                                                          | SeNHX1 <sup>1622+3N</sup>                                         |
|                                       |                   | IMS0554 | -              | -              | +              |                               |                           | $\Delta$ Sc::Se(YGR282C-YGR <sub>end</sub> )                                               |                                                          | ScCIS3*                                                           |
|                                       |                   | IMS0555 | +              | -              | +              |                               |                           |                                                                                            | SeBAT1 <sup>G1073A</sup> , ScMAL23 <sup>G422A</sup>      |                                                                   |
|                                       |                   | IMS0556 | +              | -              | +              |                               | 2xSc(CHRVIII)             |                                                                                            | SeGMC1 <sup>G1579A</sup> , ScSFL1 <sup>T605A</sup>       |                                                                   |
|                                       |                   | IMS0557 | -              | -              | +              |                               |                           |                                                                                            | ScMAL11 <sup>G88T, A98G</sup> , ScMDL2 <sup>C1451A</sup> | ScMAL11 <sup>93-1N</sup> , SeYNL247W <sup>2062-1N</sup>           |
|                                       |                   | IMS0558 | -              | +              | +              |                               |                           | $\Delta$ Sc(YDR261C-YDR211W), $\Delta$ Sc::Se(YGR218C-YGR <sub>end</sub> )                 | ScSFL1 <sup>T605A</sup>                                  | SeSFL1 <sup>96+1N</sup>                                           |
|                                       |                   | IMS0559 | +              | +              | +              |                               |                           | $\Delta$ Se::Sc(YOR133W-YOR <sub>end</sub> )                                               | ScSFL1 <sup>T605A</sup>                                  |                                                                   |
|                                       |                   | IMS0560 | +              | +              | +              |                               | 2xSe(CHRX)                | $\Delta$ Sc(YDR261C-YDR211W), $\Delta$ Se::Sc(YOR063W-YOR <sub>end</sub> )                 | ScSFL1 <sup>T605A</sup>                                  |                                                                   |
| LG30.2<br>(3x diluted wort, 30 °C)    | 468               | IMS0561 | +              | +              | +              |                               |                           | $\Delta$ Se::Sc(YBR275C-YBR <sub>end</sub> ), $\Delta$ Se::Sc(YOR133W-YOR <sub>end</sub> ) | ScSFL1 <sup>T605A</sup>                                  |                                                                   |
|                                       |                   | IMS0562 | +              | +              | +              |                               |                           | $\Delta$ Sc::Se(YNL061C-YNL055C), $\Delta$ Se::Sc(YOR133W-YOR <sub>end</sub> )             | ScSFL1 <sup>T605A</sup>                                  |                                                                   |
|                                       |                   | IMS0563 | -              | -              | +              |                               |                           | $\Delta$ Sc(YGR279C-YGR <sub>end</sub> )::Se(YMR305C-YMR <sub>end</sub> )                  | SeROG3 <sup>G191A</sup> , SeMSS51 <sup>C448T</sup>       | ScRTP1 <sup>874-64N</sup>                                         |
|                                       |                   | IMS0564 | +              | -              | +              |                               |                           |                                                                                            | SeIZH3 <sup>A526G</sup> , ScCST6 <sup>C807A</sup>        |                                                                   |
|                                       |                   | IMS0565 | -              | -              | +              |                               | $\Delta$ Sc::Se(CHRXIV)   |                                                                                            | ScMAL11 <sup>A1G</sup>                                   |                                                                   |
|                                       |                   | IMS0566 | +              | -              | -              | $\rho^-$                      |                           |                                                                                            | ScERG6 <sup>C413T</sup> , ScBUL1 <sup>G2110A</sup>       | SeYBR238C <sup>315-36N</sup>                                      |
| HG12.1<br>(Full-strength wort, 12 °C) | 52                | IMS0567 | -              | -              | -              | $\rho^-$                      |                           | $\Delta$ Sc::Se(YDR051C-YDR <sub>end</sub> ), $\Delta$ Sc::Se(YGR271W-YGR <sub>end</sub> ) |                                                          | ScULP2 <sup>1469+1N</sup>                                         |
|                                       |                   | IMS0609 | +              | -              | +              |                               |                           |                                                                                            |                                                          |                                                                   |
|                                       |                   | IMS0610 | +              | -              | -              | $\rho^-$                      |                           |                                                                                            | ScYBR259W <sup>C833A</sup>                               |                                                                   |
|                                       |                   | IMS0611 | +              | -              | -              | $\rho^-$                      |                           |                                                                                            | ScFMP52 <sup>G406C</sup>                                 |                                                                   |
|                                       |                   | IMS0612 | +              | -              | +              |                               |                           |                                                                                            |                                                          |                                                                   |
| HG12.2<br>(Full-strength wort, 12 °C) | 64                | IMS0613 | +              | -              | +              |                               |                           |                                                                                            | SeGIC2 <sup>C344G</sup> ,<br>SeSFL1 <sup>C1390T</sup>    | SeGCN2 <sup>2274+18N, 2239+18N</sup> , SeTRA1 <sup>4421-25N</sup> |
|                                       |                   | IMS0614 | +              | -              | +              |                               |                           | $\Delta$ Se(YAR050W-YAR <sub>end</sub> )::Se(YAL <sub>end</sub> -YAL063C)                  | ScCAC2 <sup>A994T</sup>                                  |                                                                   |
|                                       |                   | IMS0615 | +              | -              | +              |                               |                           |                                                                                            | ScATG1 <sup>A434C</sup>                                  |                                                                   |
|                                       |                   | IMS0616 | +              | -              | -              | $\rho^-$                      |                           |                                                                                            | SeSFL1 <sup>C1390T</sup>                                 |                                                                   |
|                                       |                   | IMS0617 | +              | -              | +              |                               |                           |                                                                                            | ScALR1 <sup>G1645T</sup>                                 |                                                                   |

12 Footnotes: A complete list of mutations is provided in Supplementary Data File 1. <sup>1</sup> Estimated number of generations prior to isolation. <sup>2</sup> Ability to utilise the  
13 sugar maltotriose. <sup>3</sup> Flocculation during growth on liquid medium. <sup>4</sup> Respiratory competence. <sup>5</sup> Presence of the mitochondrial DNA. An empty field indicates  
14 presence of the *S. eubayanus* mitochondrial DNA,  $\rho^-$  indicates complete loss of the mitochondrial genome and  $\rho^0$  partial loss. <sup>6</sup> Sc and Se indicate sequences  
15 on the *S. cerevisiae* and *S. eubayanus* subgenomes, respectively. <sup>7</sup> “ $\Delta$ ” indicates deletion, “2x” indicates duplication and “::” indicates substitution. <sup>8</sup> SNPs

16 and INDELS are only indicated when they affected an ORF and were non synonymous.<sup>9</sup> The number of nucleotides added (+N) or removed (-N) is indicated  
17 after the coordinate of the last unchanged nucleotide. *FLO9<sub>cer</sub>*\* and *CIS3<sub>cer</sub>*\* indicate coverage drops of these ORFs, for which the responsible mutation could  
18 not be exactly reconstructed. *FLO11<sub>cer</sub>*\* indicates an up to 10-fold increase in coverage in the middle of the open reading frame that indicates amplification  
19 of internal additional repeats.

## 20 **Chromosomal recombinations frequently caused loss of heterozygosity**

21           Of the 55 evolved isolates, 29 displayed segmental copy number changes. In total, 20 of the  
22 32 chromosomes in strain IMS0408 were affected in at least one isolate. Of the 55 evolved isolates,  
23 24 showed chromosome segments with increased copy number and 41 showed chromosome  
24 segments with decreased copy number (Table 1, Figure 2). 17 internal recombinations resulting in  
25 deletions were observed:  $\Delta Sc(YKL032C-YKL054C)$  occurred in 13 strains,  $\Delta Sc(YDR261C-YDR211W)$   
26 occurred in two strains, and  $\Delta Sc(YCL_{end}-YCL067C)$  and  $\Delta Sc(YCR039C-YCR_{end})$  occurred together in one  
27 strain. The internal recombinations  $\Delta Sc(YKL032C-YKL054C)$  and  $\Delta Sc(YDR261C-YDR211W)$  both  
28 resulted in loss of the sequence between the recombination sites. The recombination occurred  
29 between *IXR1* and *DEF1* in  $\Delta Sc(YKL032C-YKL054C)$  and between Ty-transposons for  $\Delta Sc(YDR261C-$   
30  $YDR211W)$ . Finally, the concurrent loss of  $Sc(YCL_{end}-YCL067C)$  and  $Sc(YCR039C-YCR_{end})$  indicated loss  
31 of both ends of *ScCHRIII*, including telomeres, consistent with recombination into a circular  
32 chromosome III at the *HMLALPHA2* and *MATALPHA2* loci (Newlon, et al. 1991).

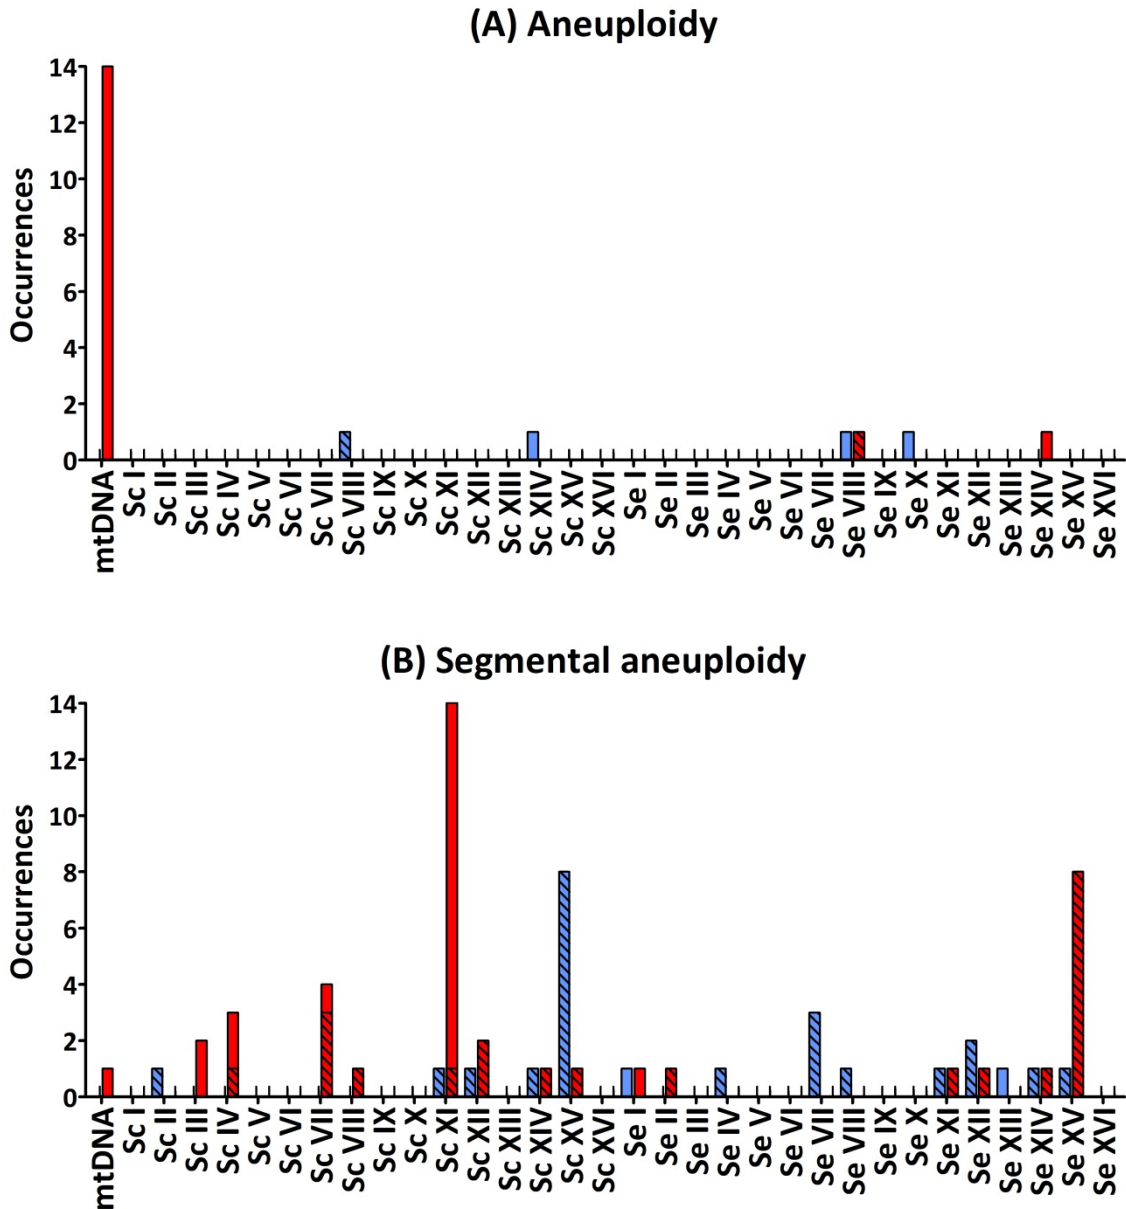

33  
 34 **Figure 2: Total number of occurrences of whole-chromosome (A) and segmental (B) aneuploidy for**  
 35 **each chromosome of IMS0408 among 55 isolates obtained after laboratory evolution under**  
 36 **simulated lager fermentation conditions.** For each chromosome, loss of genetic material is indicated  
 37 in red and duplicated genetic material is indicated in blue. Loss or duplication of *S. cerevisiae* or *S.*  
 38 *eubayanus* genetic material which was coupled with duplication or loss of the corresponding region  
 39 of the other subgenome, is indicated by checked bars. *S. eubayanus* harbours two translocations  
 40 relative to *S. cerevisiae*: between chromosomes II and IV, and between chromosomes VIII and XV. For  
 41 simplicity, copy number affecting these regions were allocated based on the *S. cerevisiae* genome  
 42 architecture.

43           The remaining 24 chromosome-segment duplications and losses reflected inter-chromosomal  
44 recombinations: one chromosomal region was replaced by an additional copy of another  
45 chromosomal region by a non-conservative recombination. The recombinations  $\Delta Sc(YGR_{279C}-$   
46  $YGR_{end})::Se(YMR_{305C}-YMR_{end})$  and  $\Delta Se(YAR_{050W}-YAR_{end})::Se(YAL_{end}-YAL_{063C})$  occurred between  
47 highly similar genes; the paralogs *SCW4* and *SCW10*, and *FLO1* and *FLO9*, respectively. In the  
48 remaining 22 cases, recombination occurred between homologous genes of each subgenome. No  
49 copy-number conservative chromosome translocations were identified.

50           Of the 26 observed recombinations, 23 occurred inside ORFs, and thus resulted in chimeric  
51 genes (Table 2). The homology between ORFs involved in recombinations varied from <70 % to 100  
52 %, with a median homology of 82.41 %. Chimeric ORFs were reconstructed by extracting reads paired  
53 to the other chromosome from the sequencing data and using them for a local assembly. This  
54 approach allowed for identification of the recombination site at a resolution that, depending on  
55 sequence homology of the two ORFs, varied between 2 to 633 nucleotides. Due to length differences  
56 and relative INDELS between the original ORFs, recombined ORFs differed in length. However, all  
57 recombinations occurred in frame and no premature stop codons were introduced, suggesting that  
58 these chimeric ORFs might yield functional proteins.

59 **Table 2: Overview of all recombinations observed in 55 isolates obtained after laboratory evolution of strain IMS0408 under simulated lager**  
 60 **fermentation conditions.**

| Recombination <sup>1,2</sup>                                        | Affected isolates                         | Locus 1           |                     |                            | Locus 2           |                     |                            | Homology <sup>5</sup> | Length chimeric ORF (bp) |
|---------------------------------------------------------------------|-------------------------------------------|-------------------|---------------------|----------------------------|-------------------|---------------------|----------------------------|-----------------------|--------------------------|
|                                                                     |                                           | Name <sup>1</sup> | Length <sup>3</sup> | Recombination <sup>4</sup> | Name <sup>1</sup> | Length <sup>3</sup> | Recombination <sup>4</sup> |                       |                          |
| $\Delta$ Se(YAR050W-YARend)<br>::Se(YALend-YAL063C)                 | IMS0614                                   | SeFLO1            | 5517                | 711-734                    | SeFLO9            | 4752                | 712-735                    | 79.23 %               | 4752                     |
| $\Delta$ Se::Sc(YBR275C-YBRend)                                     | IMS0561                                   | ScRIF1            | 5751                | 562-572                    | SeRIF1            | 5751                | 569-579                    | 77.49 %               | 5745                     |
| $\Delta$ Sc::Se(YDR051C-YDRend)                                     | IMS0567                                   | SeDET1            | 1005                | 426-434                    | ScDET1            | 1005                | 427-435                    | 84.36 %               | 1005                     |
| $\Delta$ Sc::Se(YGR218C-YGRend)                                     | IMS0558                                   | ScCRM1            | 3251                | 2626-2636                  | SeCRM1            | 3251                | 2627-2637                  | 85.84 %               | 3251                     |
| $\Delta$ Sc::Se(YGR271W-YGRend)                                     | IMS0567                                   | ScSLH1            | 5904                | 1335-1349                  | SeSLH1            | 5901                | 1336-1350                  | 82.41 %               | 5901                     |
| $\Delta$ Sc(YGR279C-YGRend)<br>::Se(YMR305C-YMRend)                 | IMS0563                                   | SeSCW10           | 1146                | 892-899                    | ScSCW4            | 1161                | 908-915                    | <70 %*                | 1146                     |
| $\Delta$ Sc::Se(YGR282C-YGRend)                                     | IMS0554                                   | SeBGL2            | 942                 | 115-125                    | ScBGL2            | 942                 | 116-126                    | 87.75 %               | 942                      |
| $\Delta$ Sc::Se(YHLend-YHL023C)                                     | IMS0552                                   | SeNPR3            | 3444                | 1551-1571                  | ScNPR3            | 3441                | 1561-1581                  | 78.80 %               | 3432                     |
| $\Delta$ Se::Sc(YKLend-YKL057C),<br>$\Delta$ Sc::Se(YKL057C-YKREnd) | IMS0548                                   | SeNUP120          | 3114                | 1867-1868                  | ScNUP120          | 3114                | 1868-1869                  | 80.14 %               | 3114                     |
| $\Delta$ Sc::Se(YLR154C-YLREnd)                                     | IMS0544                                   | Ribosomal DNA     | -                   | -                          | Ribosomal DNA     | -                   | -                          | -                     | -                        |
| $\Delta$ Se::Sc(YLR154C-YLREnd)                                     | IMS0599                                   | Ribosomal DNA     | -                   | -                          | Ribosomal DNA     | -                   | -                          | -                     | -                        |
| $\Delta$ Sc::Se(YLR305C-YLREnd)                                     | IMS0604                                   | SeSTT4            | 5703                | 5013-5018                  | ScSTT4            | 5703                | 5014-5019                  | 81.64 %               | 5703                     |
| $\Delta$ Sc::Se(YNL061C-YNL055C)                                    | IMS0562                                   | ScNOP2            | 1857                | 1386-1391                  | SeNOP2            | 1860                | 1390-1395                  | 87.11 %               | 1857                     |
|                                                                     |                                           | ScPOR1            | 852                 | 399-401                    | SePOR1            | 852                 | 400-402                    | 85.82 %               | 852                      |
| $\Delta$ Se::Sc(YNLend-YNL123W)                                     | IMS0603                                   | ScNMA111          | 2994                | 303-314                    | SeNMA111          | 2994                | 304-315                    | 83.61 %               | 2994                     |
| $\Delta$ Sc::Se(YOL013C-YOL006C)                                    | IMS0603                                   | SeTOP1            | 2304                | 2010-2021                  | ScTOP1            | 2311                | 2017-2028                  | 82.64 %               | 2304                     |
| $\Delta$ Se::Sc(YOLend-YOL013C)                                     | IMS0603                                   | SeHRD1            | 1644                | 312-329                    | ScHRD1            | 1656                | 313-330                    | 82.82 %               | 1656                     |
| $\Delta$ Se::Sc(YOLend-YOL057W)                                     | IMS0597                                   | ScYOL057W         | 3015                | 99-116                     | SeYOL057W         | 2133                | 100-117                    | <70 %*                | 2133                     |
| $\Delta$ Se::Sc(YOLend-YOL072W)                                     | IMS0595                                   | ScTHP1            | 1368                | 726-731                    | SeTHP1            | 1374                | 733-738                    | 79.07 %               | 1368                     |
| $\Delta$ Se::Sc(YOLend-YOL075W)                                     | IMS0600                                   | SeYOL075C         | 3903                | 2409-2414                  | ScYOL075C         | 3885                | 2392-2397                  | 81.85 %               | 3903                     |
| $\Delta$ Se::Sc(YOR063W-YOREnd)                                     | IMS0560                                   | ScRPL3            | 1164                | 1023-1063                  | SeRPL3            | 1164                | 1024-1064                  | 94.59 %               | 1164                     |
| $\Delta$ Se::Sc(YOR133W-YOREnd)                                     | IMS0559, IMS0561 and IMS0562              | ScEFT1            | 2529                | 246-311                    | SeEFT1            | 2529                | 247-312                    | 94.94 %               | 2529                     |
| $\Delta$ Sc(YCLend-YCL067C),<br>$\Delta$ Sc(YCRO39C-YCREnd)         | IMS0551                                   | ScHMLALPHA2       | 633                 | 1-633                      | ScMATALPHA2       | 633                 | 1-633                      | 100 %                 | 633                      |
| $\Delta$ Sc(YDR261C-YDR211W)                                        | IMS0558 and IMS0560                       | TY-transposon     | -                   | -                          | TY-transposon     | -                   | -                          | -                     | -                        |
| $\Delta$ Sc(YKL032C-YKL054C)                                        | IMS0543-547, IMS0599, IMS0601 and IMS0602 | ScIXR1            | 1794                | 944-955                    | ScDEF1            | 2217                | 1281-1292                  | <70 %*                | 1881                     |
| $\Delta$ Sc(YKL032C-YKL054C)                                        | IMS0604-608                               | ScIXR1            | 1794                | 332-341                    | ScDEF1            | 2217                | 1272-1281                  | <70 %*                | 1278                     |

61 Footnotes: <sup>1</sup> Sc and Se indicate sequences on the *S. cerevisiae* and *S. eubayanus* subgenomes, respectively. <sup>2</sup> “ $\Delta$ ” indicates deletion and “::” indicates  
 62 substitution. <sup>3</sup> Length of the affected ORF in bp. <sup>4</sup> Nucleotide coordinates of the locus at which recombination could have occurred. Due to the high  
 63 homology of Locus 1 and Locus 2, they shared identical sequence stretches within which the recombination could have occurred. Recombination sites are  
 64 therefore indicated by a range of nucleotide coordinates within the ORFs. <sup>5</sup> Homology between Locus 1 and Locus 2 as determined by sequence alignment.



65 ***IRA2*, *SFL1* and *MAL11* are mutated in multiple evolved isolates**

66 A total of 76 SNPs and 43 INDELS were identified in the genomes of the 55 isolates (Supplementary  
67 Data File 1A and 1B), of which 38 SNPs and 17 INDELS occurred in ORFs and were non-synonymous  
68 (Table 1). Gene ontology analysis of all genes affected by non-synonymous SNPs or INDELS did not  
69 yield a significant enrichment in specific biological processes, molecular functions or cellular  
70 components. However, the genes *IRA2*, *SFL1* and *MAL11* were affected in more than one strain. *IRA2*  
71 encodes a RAS GTPase-activating protein, which is disrupted in many *S. cerevisiae* genomes from the  
72 CEN.PK strain family (Tanaka, et al. 1990; Tanaka, et al. 1991; Nijkamp, et al. 2012). In strain  
73 IMS0408, the *ScIRA2* was indeed disrupted while the *SeIRA2* ORF was intact. However, *SeIRA2* was  
74 mutated in 6/10 isolates from LG12.1 after 232 generations. *SeIRA2* had a frameshift in IMS0594, a  
75 premature stop codon in IMS0596 and was completely lost in four isolates due to different loss of  
76 heterozygosities:  $\Delta Se::Sc(YOL_{end}-YOL072W)$  in IMS0595,  $\Delta Se::Sc(YOL_{end}-YOL057W)$  in IMS0597,  
77  $\Delta Se::Sc(YOL_{end}-YOL075W)$  in IMS0600 and  $\Delta Se::Sc(YOL_{end}-YOL013C)$  in IMS0603.

78 *SFL1* encodes a transcriptional repressor of flocculation genes, which was present both on  
79 *ScCHRXV* and *SeCHRVIII* (Atsushi, et al. 1989). *ScSFL1* was mutated in 6/10 isolates from LG30.1 after  
80 464 generations, which harboured a non-conservative substitution at the 605<sup>th</sup> nucleotide, affecting  
81 its DNA binding domain (Atsushi, et al. 1989). *SeSFL1* had a frameshift in IMS0558 (LG30.1), a single  
82 nucleotide substitution in IMS0614 and IMS0617 (HG12.2) and was completely lost in four isolates of  
83 LG30.1 due to two losses of heterozygosity:  $\Delta Se::Sc(YOR133W-YOR_{end})$  in IMS0559, IMS0561 and  
84 IMS0562, and  $\Delta Se::Sc(YOR063W-YOR_{end})$  in IMS0560 (Table 1).

85 *ScMAL11*, also referred to as *AGT1*, encodes the only maltose transporter of the *MAL* gene family  
86 which enables efficient uptake of maltotriose in IMS0408 (Alves, et al. 2008). *ScMAL11* is located on  
87 the right arm of *ScCHRVII* and is absent in the *S. eubayanus* subgenome of IMS0408, which has no  
88 other maltotriose transporters (Hebly, et al. 2015; Brickwedde, et al. 2018). *ScMAL11* had a  
89 frameshift in IMS0557 (LG30.1) and lost its start codon in IMS0565 (LG30.2) (Table 1). In addition,  
90 *ScMAL11* was completely lost due to three different losses of heterozygosity:  $\Delta Sc::Se(YGR282C-$

91 YGR<sub>end</sub>) in IMS0554 (LG30.1),  $\Delta Sc::Se(YGR218C-YGR_{end})$  in IMS0558 (LG30.1) and  $\Delta Sc::Se(YGR271W-$   
92 YGR<sub>end</sub>) in IMS0567 (LG30.2), and due to the non-conservative recombination  $\Delta Sc(YGR279C-$   
93 YGR<sub>end</sub>):: $Se(YMR305C-YMR_{end})$  in IMS0563 (LG30.2).

#### 94 **Mutations in *SFL1* cause emergence of calcium-dependent flocculation**

95 Eight of the 55 evolved isolates showed SNPs, INDELS or loss of heterozygosity in the flocculation  
96 inhibitor gene *SFL1*. In isolates IMS0558, IMS0559, IMS0560, IMS0561 and IMS0562 from LG30.1,  
97 both *SeSFL1* and *ScSFL1* were mutated, while in isolate IMS0556 from LG30.1 only *ScSFL1* was  
98 mutated and in isolates IMS0614 and IMS0617 from HG12.2, only *SeSFL1* was mutated. Evolved  
99 isolates that carried mutations in both *ScSFL1* and *SeSFL1* formed elevated conically-shaped colonies  
100 on YPD agar, while strain IMS0408 and evolved isolates with either an intact *SeSFL1* or *ScSFL1* did not  
101 (Figure 3A). Strains with mutations in both *ScSFL1* and *SeSFL1* also showed rapid sedimentation in  
102 micro-aerobic cultures on wort, which was not observed for the other evolved isolates or for strain  
103 IMS0408 (Figure 3F).

104

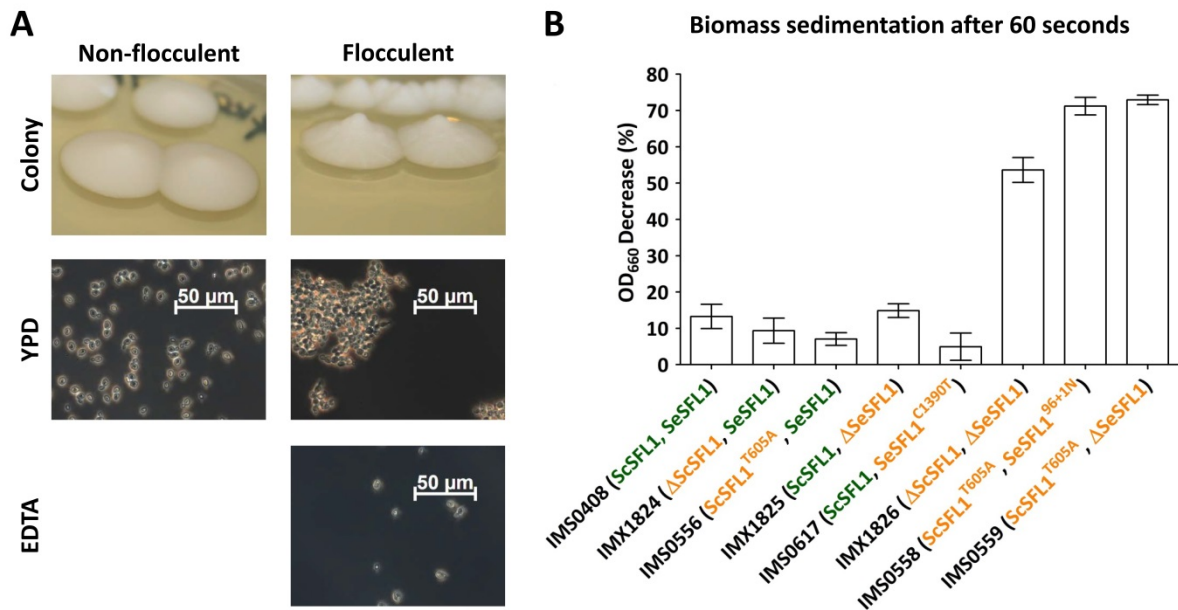

105

106

107

108

109

110

111

112

113

114

**Figure 3: Mutations in *ScSFL1* and *SeSFL1* correlate with flocculation in evolved isolates and reverse engineered strains.** A) Colony morphology and phase-contrast microscopy images (100x) of YPD-grown cell suspensions of the non-evolved, non-flocculent strain (IMS0408) and of a typical flocculent evolved isolate (IMS0558). Resuspension in 50 mM EDTA (pH 7.0) eliminated flocculation. B) Biomass sedimentation of evolved isolates and engineered strains with mutations in *SeSFL1* and/or *ScSFL1*. Triplicate cultures of all strains were grown on YPD and sedimentation was measured as the decrease in OD<sub>660</sub> right underneath the meniscus of a stationary cell suspensions 60 s after the suspension had been vortexed.

114

115

116 *SFL1* is a repressor of *FLO* effector genes, which mediate calcium-dependent flocculation in *S.*  
117 *pastorianus* strains. To test if the acquired mutations in *SFL1* affected calcium-dependent  
118 flocculation, cultures from each strain were inspected microscopically. In the absence of EDTA, all  
119 sedimenting strains formed large aggregates, while IMS0408 and strains with an intact *SeSFL1* or  
120 *ScSFL1* did not (Figure 3A). Upon resuspension in Ca<sup>2+</sup>-chelating EDTA buffer, the aggregates reverted  
121 into a single-cell suspensions, thus confirming Ca<sup>2+</sup>-dependent flocculation. To test if the mutations  
122 affecting *SeSFL1* and *ScSFL1* were responsible for the calcium-dependent flocculation, single and  
123 double knockout strains were made using CRISPR-Cas9 gene editing: IMX1824  
124 ( $\Delta ScSFL1::mTurquoise2$ ), IMX1825 ( $\Delta SeSFL1::Venus$ ) and IMX1826 ( $\Delta ScSFL1::mTurquoise2$ ,  
125  $\Delta SeSFL1::Venus$ ). Flocculation intensity was assessed by measuring the decrease in OD<sub>660</sub> at the  
126 surface of stationary-phase cultures after 1 minute without shaking. Isolates with mutations affecting  
127 only *SeSFL1* or only *ScSFL1* did not sediment significantly faster than IMS0408, which showed a  
128 decrease in OD<sub>660</sub> of  $13.3 \pm 5.8$  % (Figure 3B). However, IMX1826 ( $mTurquoise2::\Delta ScSFL1$ ,  
129  $Venus::\Delta SeSFL1$ ), IMS0558 (*ScSFL1*<sup>T605A</sup>, *SeSFL1*<sup>96+1N</sup>) and IMS0559 (*ScSFL1*<sup>T605A</sup>,  $\Delta SeSFL1$ ) all showed  
130 decreases in OD<sub>660</sub> above 53.6 %, indicating that disruption of both *ScSFL1* and *SeSFL1* causes a  
131 significant increase in flocculation (Student's T test,  $p < 0.0011$ ). Since *SeSFL1* harboured three  
132 different mutations in isolates IMS0558, IMS0559, IMS0560, IMS0561 and IMS0562, calcium-  
133 dependent flocculation emerged by at least three independent mutations during the laboratory  
134 evolution experiment LG30.2.

### 135 **Mutations in *ScMAL11* cause loss of maltotriose utilisation**

136 *ScMAL11*, which encodes the sole maltotriose transporter in strain IMS0408, was mutated in six  
137 evolved isolates. To investigate if these mutations affected maltotriose fermentation, the isolates  
138 were grown micro-aerobically on diluted wort at 30 °C. The unevolved IMS0408 consumed  $100 \pm 0$  %  
139 of the maltotriose in diluted wort, and evolved strains with an intact *ScMAL11* genes consumed  $98 \pm$

140 3 %. In contrast, strains IMS0554, IMS0557, IMS0558, IMS0563, IMS0565 and IMS0567, which all  
141 harboured mutations in *ScMAL11*, did not show any maltotriose consumption; instead, the  
142 concentration increased by  $14 \pm 3$  % on average, presumably due to water evaporation. To test if the  
143 mutations affecting *ScMAL11* were responsible for the loss of maltotriose utilisation, *ScMAL11* was  
144 deleted in strain IMS0408 using CRISPR-Cas9 gene editing, resulting in strain IMX1698  
145 ( $\Delta ScMAL11::mVenus$ ). Under the same conditions used to evaluate maltotriose utilization by the  
146 evolved strains, strain IMS0408 consumed  $97 \pm 5$  % of the maltotriose while strain IMX1698 only  
147 consumed  $1 \pm 0$  % of the maltotriose. These results confirmed that loss of *ScMAL11* function was  
148 responsible for loss of maltotriose utilization.

149 **Discussion**

150 Evolution of the laboratory *S. cerevisiae* x *S. eubayanus* IMS0408 under simulated lager-brewing  
151 conditions yielded a wide array of mutations, including SNPs, INDELS, chromosomal recombinations,  
152 aneuploidy and loss of mitochondrial DNA (Table 1, Additional file 2). SNPs were the most common  
153 type of mutation, with frequencies ranging between 0.004 and 0.039 per division (Figure 4). Based on  
154 a genome size of 24.2 Mbp, the rate at which single-nucleotide mutations occurred was between  
155  $1.7 \cdot 10^{-10}$  and  $1.6 \cdot 10^{-9}$  per nucleotide per cell division, which is similar to a rate of  $3.3 \cdot 10^{-10}$  per site per  
156 cell division reported for *S. cerevisiae* (Lynch et al. 2008). At a frequency of 0.003 and 0.010 per cell  
157 division, INDELS occurred up to 4.1-fold less frequently than SNPs, in accordance with their twofold  
158 lower occurrence in *S. cerevisiae* (Lang and Murray 2008). The higher incidence of both SNPs and  
159 INDELS in isolates evolved in full-strength wort (Figure 4) may be related to the higher concentrations  
160 of ethanol, a known mutagen, in these cultures (Voordeckers, et al. 2015). The rate of loss of  
161 mitochondrial DNA varied between 0.0001 and 0.007 per division (Figure 4), and was negatively  
162 correlated with the number of generations of selective growth, indicating loss of mitochondrial DNA  
163 is selected against. The percentage of respiratory deficient isolates, between 13 and 40 % for all  
164 evolutions, is consistent with observations during laboratory evolution under oxygen limitation, and  
165 has been associated with increased ethanol tolerance (Ibeas and Jimenez 1997; Taylor, et al. 2002).  
166 However, loss of respirative capacity is highly undesirable for lager brewing as it impedes biomass  
167 propagation (Gibson, et al. 2008).

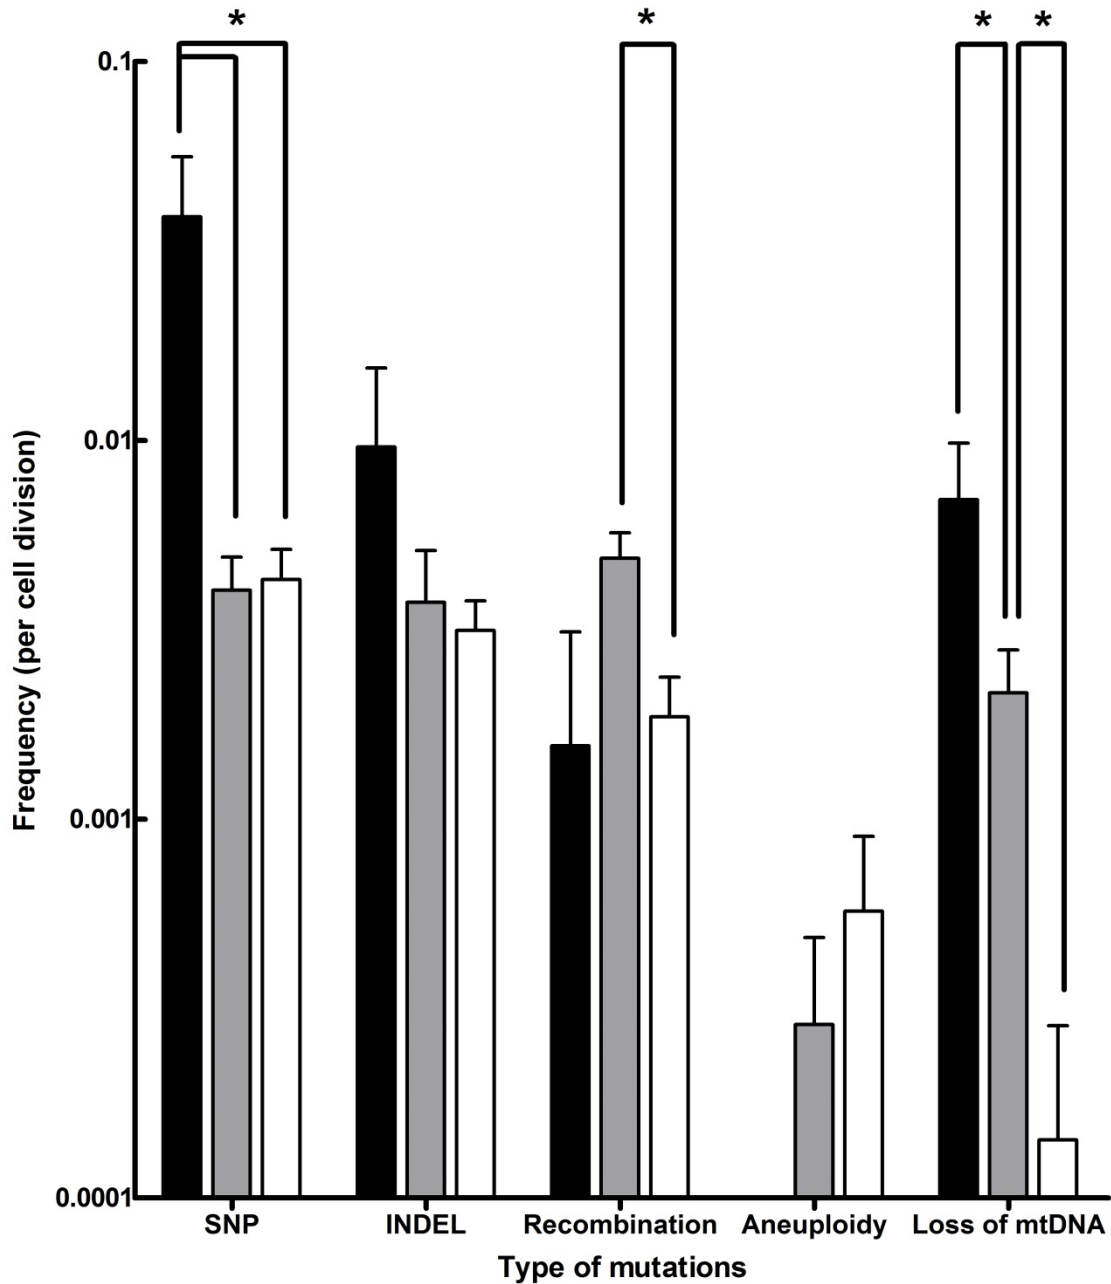

168  
169 **Figure 4: Frequencies of different types of mutations observed in evolved isolates obtained after**  
170 **laboratory evolution of strain IMS0408 under simulated lager fermentation conditions.** The  
171 mutations identified in all 55 isolates evolved under brewing conditions were classified by type, and  
172 the frequency of mutation per cell division was calculated for each isolate based on its estimated  
173 number of generations of growth under simulated brewing conditions. Average frequencies of  
174 mutation types and standard deviations are shown for isolates evolved on full-strength wort at 12 °C  
175 (black), on three-fold diluted wort at 12 °C (grey) and on threefold diluted wort at 30 °C (white). The  
176 frequencies are shown on a logarithmic scale, and p-values were determined using Student's t-test.

177

178           The frequency of chromosomal recombinations was estimated between 0.002 and 0.005 per  
179 division (Figure 4), which is similar to frequencies reported for *S. cerevisiae* (Dunham, et al. 2002).  
180 The observed recombinations were not reciprocal translocations. Instead, in all cases, genetic  
181 material was lost due to internal deletions, or genetic material from one chromosome was replaced  
182 by an additional copy of genetic material from another chromosome. This abundant loss of  
183 heterozygosity is consistent with the evolutionary history of *S. cerevisiae* (Magwene, et al. 2011) and  
184 with previously observed loss of genetic material in hybrids (Sipiczki 2008; Peris, et al. 2017;  
185 Smukowski Heil, et al. 2017; Smukowski Heil, et al. 2018). Under selective conditions, regions from  
186 one subgenome can be preferentially affected by loss of heterozygosity due to the fitness effects of  
187 genes they harbour. Due to its irreversibility, loss of heterozygosity is a determining mechanism for  
188 the evolution of hybrids during domestication (Pérez Través, et al. 2014). For example, in an *S.*  
189 *cerevisiae* x *S. uvarum* hybrid, the chromosomal region harbouring *ScPHO84* was preferentially  
190 retained at 30 ° C, while it was lost at the expense of its *S. uvarum* homolog at 15 ° C (Smukowski  
191 Heil, et al. 2017; Smukowski Heil, et al. 2018). Similarly, the superior growth of *S. cerevisiae* at 30 °C  
192 relative to *S. paradoxus* could be linked to *S. cerevisiae* alleles of 8 genes by investigating the effect of  
193 loss of heterozygosity in a laboratory hybrid (Weiss, et al. 2018). Moreover, the deletion of *S.*  
194 *cerevisiae* alleles in *S. uvarum* x *S. cerevisiae* had strong and varying impacts on fitness under glucose-  
195 , sulphate- and phosphate-limitation (Lancaster, et al. 2018). Overall, loss of heterozygosity is an  
196 irreversible process which enables rapid adaptation of hybrid genomes to the selective pressure of  
197 their growth environment. In the present study, loss of heterozygosity notably affected *ScMAL11* and  
198 *SeSFL1*, contributing to the acquired flocculation and loss of maltotriose utilization phenotypes.  
199 Other observed losses of heterozygosity may be due to genetic drift, or they may yield a selective  
200 advantage which we did not identify. Loss of heterozygosity may be advantageous by removing  
201 unfavourable dominant alleles, by enabling the expression of favourable recessive alleles, or by  
202 resolving redundancy, cross-talk and possible incompatibility between alleles and genes of both  
203 subgenomes (Piatkowska, et al. 2013; Gibson and Liti 2015).



204 Whole-chromosome aneuploidy was the rarest type of mutation, occurring only between 0  
205 and 0.0003 times per division (Figure 4). The emergence of single chromosome aneuploidy in 9 % of  
206 the isolates after laboratory evolution is similar to observations during laboratory evolution of *S.*  
207 *cerevisiae* (Yona, et al. 2012; Voordeckers, et al. 2015; González-Ramos, et al. 2016; Gorter de Vries,  
208 Pronk, et al. 2017). However, the observed small extent of aneuploidy starkly contrasts with the  
209 massive aneuploidy of *S. pastorianus* brewing strains (Van den Broek, et al. 2015; Okuno, et al. 2016).  
210 These differences might of course be attributed to the difference in time scale between four months  
211 of laboratory evolution and several centuries of domestication. However, they might also be due to  
212 differences between the *S. cerevisiae* x *S. eubayanus* IMS0408 evolved in this study and the ancestral  
213 *S. pastorianus* hybrid. Firstly, IMS0408 was obtained by crossing a haploid *S. cerevisiae* strain with a  
214 haploid *S. eubayanus* spore (Hebly, et al. 2015). In contrast, the progenitor of brewing strains of *S.*  
215 *pastorianus* may have resulted from a cross of higher ploidy strains (Okuno, et al. 2016). Since higher  
216 ploidy leads to higher chromosome missegregation rates, they accumulate chromosome copy  
217 number changes faster (Storchova 2014). In addition, the higher initial ploidy leads to a smaller  
218 relative increase of genetic material when an additional copy is gained, which may ‘buffer’  
219 deleterious effects of further changes in ploidy (Torres, et al. 2007). Moreover, the ancestral *S.*  
220 *pastorianus* hybrid may have had, or have acquired, mutations that stimulate extensive aneuploidy,  
221 such as mutations increasing the rate of chromosome missegregation or mutations increasing the  
222 tolerance against aneuploidy associated stresses (Torres, et al. 2010). Regardless of the origin of the  
223 extensive aneuploidy of *S. pastorianus*, our results show that euploid *S. cerevisiae* x *S. eubayanus*  
224 hybrids are not by definition prone to extensive aneuploidy under brewing-related experimental  
225 conditions. For industrial applications, the relative genetic stability of newly generated  
226 *Saccharomyces* hybrid strains reduces the chance of strain deterioration during the many  
227 generations involved in large-scale fermentation and/or biomass recycling (Krogerus, et al. 2017).

228 In addition to showing extensive aneuploidy, *S. pastorianus* strains harbour numerous  
229 chromosomal recombinations. During the laboratory evolution experiments, two types of

230 recombinations were observed: (i) intrachromosomal recombinations resulting in loss of  
231 chromosome segments, and (ii) interchromosomal recombinations resulting in loss of one  
232 chromosome segment and replacement by an additional copy of a segment from another  
233 chromosome, resulting in loss of heterozygosity. While in *S. cerevisiae*, chromosomal recombinations  
234 predominantly occur in repetitive regions of the genome (Dunham, et al. 2002; Fontdevila 2005),  
235 here 88 % of the observed recombinations occurred within ORFs. The average homology of the  
236 recombined ORFs did not exceed the average 85 % homology of ORFs in the *S. cerevisiae* and *S.*  
237 *eubayanus* subgenomes. Instead, the high rate of recombinations at ORFs could reflect a correlation  
238 between transcriptional activity and recombination (Thomas and Rothstein 1989). In all cases, the  
239 reading frames were conserved, resulting in chimeric ORFs which could encode functional chimeric  
240 proteins, with altered length and sequences compared to the parental genomes. The potential  
241 selective advantage of such chimeric proteins is illustrated by recurring recombinations between  
242 ammonium permease *MEP2* alleles in a *S. cerevisiae* and *S. uvarum* hybrid during laboratory  
243 evolution under nitrogen limitation conditions (Dunn, et al. 2013). The formation of chimeric ORFs  
244 has even led to the emergence of novel gene functions, as illustrated by the formation of a  
245 maltotriose transporter by recombination of three non-maltotriose transporter genes in *S.*  
246 *eubayanus* during laboratory evolution (Brouwers, et al. 2018).

247         The predominant occurrence of recombinations within ORFs in the evolved isolates has also  
248 been observed in the genomes of brewing strains of *S. pastorianus*, which all share identical  
249 recombinations at the *ZUO1*, *MAT*, *HSP82* and *XRN1/KEM1* loci (Hewitt, et al. 2014; Walther, et al.  
250 2014; Okuno, et al. 2016). These common recombinations suggest that all *S. pastorianus* isolates  
251 descend from a common ancestor (Monerawela and Bond 2018). However, since identical  
252 recombinations have been observed in independent evolutions, identical recombinations might  
253 reflect parallel evolution due to a strong selective advantage under brewing-related conditions  
254 and/or a predisposition of specific loci for recombination (Dunham, et al. 2002; Dunn, et al. 2013). Of  
255 the recombination loci found in the present study, only *EFT1* and *MAT* loci were associated with

256 recombinations in *S. pastorianus*. Moreover, the recombinations at these loci in the evolved isolates  
257 were different from those in *S. pastorianus* (Hewitt, et al. 2014; Walther, et al. 2014; Okuno, et al.  
258 2016; Monerawela and Bond 2017). All interchromosomal recombinations observed in this study  
259 were unique. These results, obtained under brewing-related conditions, are consistent with the  
260 notion that recombination sites are largely aleatory and that all modern *S. pastorianus* strains  
261 descend from a single hybrid ancestor.

262 Different recombination events resulted in the loss of heterozygosity, in four isolates each, of  
263 the right arm of *SeCHRXV*, including *SeSFL1*, and of the right arm of *ScCHRXI*, including *ScMAL11*.  
264 These events directly affected two phenotypes relevant for brewing fermentation: calcium-  
265 dependent flocculation, which led to fast biomass sedimentation, and loss of maltotriose utilisation.  
266 Biomass sedimentation can be strongly selected for in sequential batch bioreactors, as it increases  
267 the chance that cells are retained in the bioreactor during the emptying phase (Oud, et al. 2013;  
268 Hope, et al. 2017). A similar selective advantage is likely to have played a role in the early  
269 domestication of *S. pastorianus*, as sedimenting yeast remaining in fermentation vessels was more  
270 likely to be used in a next fermentation. Flocculation is a key characteristic of current lager-brewing  
271 yeasts (also referred to as bottom-fermenting yeasts), as it simplifies biomass separation at the end  
272 of the fermentation (Ferreira, et al. 2010). The present study illustrates how this aspect of brewing  
273 yeast domestication can be rapidly reproduced under simulated laboratory conditions.

274 At first glance, loss of the ability to utilize maltotriose, an abundant fermentable sugar in  
275 wort, appears to be undesirable from an evolutionary perspective. However, as demonstrated in  
276 studies on laboratory evolution of *S. cerevisiae* in sequential batch cultures on sugar mixtures, the  
277 selective advantage of consuming a specific sugar from a sugar mixture correlates with the number  
278 of generations of growth on that sugar during each cultivation cycle (Wisselink, et al. 2009;  
279 Verhoeven, et al. 2018). *Saccharomyces* yeasts, including strain IMS0408 generally prefer glucose and  
280 maltose over maltotriose (Alves, et al. 2008; Hebly, et al. 2015; Brickwedde, et al. 2017). As a

281 consequence, maltotriose consumption from wort typically only occurs when growth has already  
282 ceased due to oxygen limitation and/or nitrogen source depletion, which results in few or no  
283 generations of growth on this trisaccharide. However, loss of maltotriose utilization in six isolates in  
284 two independent evolution experiments strongly suggests that loss of *ScMAL11* expression was not  
285 merely neutral but even conferred a selective advantage. These results are consistent with the  
286 existence of many *S. pastorianus* strains with poor maltotriose utilisation and with the truncation of  
287 *ScMAL11* in all *S. pastorianus* strains, including good maltotriose utilizers (Vidgren, et al. 2009;  
288 Gibson, et al. 2013). In the latter strains, maltotriose utilisation depends on alternative transporters  
289 such as Mty1 (Dietvorst, et al. 2005; Salema-Oom, et al. 2005). It is therefore unclear if a selective  
290 advantage of the loss of *ScMAL11* reflects specific properties of this gene or its encoded transporter  
291 or, alternatively, a general negative impact of maltotriose utilisation under brewing-related  
292 conditions. In analogy with observations on maltose utilization by *S. cerevisiae*, unrestricted Mal11-  
293 mediated maltotriose-proton symport might cause maltotriose-accelerated death (Postma, et al.  
294 1990; Jansen, et al. 2004). Alternatively, expression of the Mal11 transporter might compete with  
295 superior maltose transporters for intracellular trafficking, membrane integration and/or membrane  
296 space (Vidgren 2010; Libkind, et al. 2011). Indeed, laboratory evolution to obtain improved  
297 maltotriose utilisation resulted in reduced maltose uptake in *S. pastorianus* (Brickwedde, et al. 2017).

298 *Saccharomyces* hybrids are commonly applied for industrial applications such as lager beer  
299 brewing and wine fermentation (Naumov, et al. 2001; González, et al. 2006; Libkind, et al. 2011).  
300 Recently, novel hybrids have been generated, that performed well under a broad range of  
301 industrially-relevant conditions (Bellon, et al. 2011; Hebly, et al. 2015; Lopandic, et al. 2016;  
302 Krogerus, et al. 2017; Nikulin, et al. 2017; Peris, et al. 2017). While the performance and phenotypic  
303 diversity of laboratory hybrids support their application in industrial processes, further strain  
304 development of such hybrids could improve their performance (Steensels, et al. 2014; Krogerus, et al.  
305 2017). Especially in food and beverage fermentation processes, consumer acceptance issues largely  
306 preclude use of targeted genetic modification techniques. Laboratory evolution offers an interesting

307 alternative strategy for ‘non-GMO’ strain improvement (Bachmann, et al. 2015). However, as  
308 exemplified by the loss, in independent laboratory evolution experiments, of *MAL11* and of the  
309 mitochondrial genome, mutations that yield increased fitness under simulated industrial  
310 fermentation conditions are not necessarily advantageous for industrial performance. Therefore,  
311 instead of faithfully reconstructing industrial conditions in the laboratory, laboratory evolution  
312 experiments should be designed to specifically select for desired phenotypes. For example, a recent  
313 study illustrated how maltotriose fermentation kinetics of an *S. pastorianus* hybrid could be  
314 improved by laboratory evolution in carbon-limited chemostats grown on a maltotriose-enriched  
315 sugar mixture (Brickwedde, et al. 2017).

## 316 Materials and Methods

### 317 Yeast strains and media

318 *Saccharomyces* strains used in this study are listed in Supplementary Table 3. Yeast strains and *E. coli*  
319 strains containing plasmids were stocked in 1 mL aliquots after addition of 30 % v/v glycerol to the  
320 cultures and stored at -80 °C. For preparation of stock cultures and inocula of bioreactors, yeast  
321 strains were routinely propagated in shake flasks containing 100 mL YPD ( 10 g.L<sup>-1</sup> yeast extract, 20  
322 g.L<sup>-1</sup> yeast peptone and 20 g.L<sup>-1</sup> glucose) at 30 °C and 200 RPM in an Brunswick Innova43/43R shaker  
323 (Eppendorf Nederland B.V., Nijmegen, The Netherlands). For cultivation on solid media, YPD medium  
324 was supplemented with 20 g.L<sup>-1</sup> Bacto agar (Becton Dickinson, Breda, The Netherlands) and  
325 incubation was done at 30 °C. Synthetic medium (SM), containing 3 g.L<sup>-1</sup> KH<sub>2</sub>PO<sub>4</sub>, 0.5 g.L<sup>-1</sup>  
326 MgSO<sub>4</sub>.7H<sub>2</sub>O, 5 g.L<sup>-1</sup> (NH<sub>4</sub>)<sub>2</sub>SO<sub>4</sub>, 1 mL.L<sup>-1</sup> of a trace element solution and 1 mL.L<sup>-1</sup> of a vitamin  
327 solution, was prepared as previously described (Verduyn, et al. 1992). SM maltotriose was  
328 supplemented with 20 g.L<sup>-1</sup> of maltotriose and SM ethanol with 20 mL.L<sup>-1</sup> of ethanol. Selection for the  
329 amdS marker was performed on SM-AC: SM with 0.6 g.L<sup>-1</sup> acetamide and 6.6 g L<sup>-1</sup> K<sub>2</sub>SO<sub>4</sub> instead of  
330 (NH<sub>4</sub>)<sub>2</sub>SO<sub>4</sub> as nitrogen source (Solis-Escalante, et al. 2013). For counter selection of the amdS marker,  
331 strains were first grown on YPD and then on SM-FAC: SM supplemented with 2.3 g.L<sup>-1</sup>  
332 fluoroacetamide (Solis-Escalante, et al. 2013). Industrial wort was provided by HEINEKEN Supply  
333 Chain B.V., Zoeterwoude, the Netherlands, and contained 14.4 g/L glucose, 2.3 g/L fructose, 85.9 g/L  
334 maltose, 26.8 g/L maltotriose and 269 mg/L free amino nitrogen. The wort was supplemented with  
335 1.5 mg.L<sup>-1</sup> Zn<sup>2+</sup> by addition of ZnSO<sub>4</sub>.7H<sub>2</sub>O, then autoclaved for 30 min at 121 °C and, prior to use,  
336 filtered through Nalgene 0.2 µm SFCA bottle-top filters (ThermoFisher Scientific, Waltham, MA). For  
337 experiments performed with diluted wort, two volumes of sterile demineralized water were added  
338 per volume of wort. To prevent excessive foaming during the aeration phase of the bioreactor  
339 experiments, (un)diluted wort was supplemented with 0.2 mL.L<sup>-1</sup> of sterile Pluronic PE 6100 antifoam  
340 (Sigma-Aldrich, Zwijndrecht, the Netherlands).

341

342 **Table 3: Plasmids used throughout this study.**

| Name    | Relevant genotype                                                                           | Origin                                   |
|---------|---------------------------------------------------------------------------------------------|------------------------------------------|
| pUD711  | <i>ori bla</i> gRNA- <i>ScSFL1</i>                                                          | GeneArt™                                 |
| pUD712  | <i>ori bla</i> gRNA- <i>SeSFL1</i>                                                          | GeneArt™                                 |
| pUDE481 | <i>ori bla</i> ARS4/CEN6 <i>hyg<sup>R</sup></i> <i>ScTDH3p</i> -mTurquoise2- <i>ScADH1t</i> | (Gorter de Vries, et al. 2018)           |
| pUDE482 | <i>ori bla</i> ARS4/CEN6 <i>hyg<sup>R</sup></i> <i>ScTEF1p</i> -Venus- <i>ScENO2t</i>       | (Gorter de Vries, et al. 2018)           |
| pUDP004 | <i>ori bla</i> panARSopt <i>amdSYM Spcas9</i>                                               | (Gorter de Vries, de Groot, et al. 2017) |
| pUDP045 | <i>ori bla</i> panARSopt <i>amdSYM Spcas9</i> gRNA- <i>ScMAL11</i>                          | (Gorter de Vries, et al. 2018)           |
| pUDP104 | <i>ori bla</i> panARSopt <i>amdSYM Spcas9</i> gRNA- <i>ScSFL1</i>                           | This study                               |
| pUDP105 | <i>ori bla</i> panARSopt <i>amdSYM Spcas9</i> gRNA- <i>SeSFL1</i>                           | This study                               |

343

344 Analytical methods and statistics

345 Optical density at 660 nm was measured with a Libra S11 spectrophotometer (Biochrom, Cambridge,  
346 UK). HPLC analysis of sugar and metabolite concentrations was performed with an Agilent Infinity  
347 1260 chromatography system (Agilent Technologies, Santa Clara, CA) with an Aminex HPX-87 column  
348 (Bio-Rad, Lunteren, The Netherlands) at 65 °C, eluted with 5 mM H<sub>2</sub>SO<sub>4</sub>. Significance of data was  
349 assessed by an unpaired two-tailed Student's t-test with a 95 % confidence interval.

350 Laboratory evolution and single colony isolation

351 The hybrid yeast strain IMS0408 was evolved under three different conditions in duplicate in Minifors  
352 2 bioreactors (INFORS HT, Velp, the Netherlands) with a working volume of 100 mL: on diluted wort  
353 at 30 °C (LG30.1 and LG30.2), on diluted wort at 12 °C (LG12.1 and LG12.2) and on full-strength wort  
354 at 12 °C (HG12.1 and HG12.2). Sequential batch cultivation was performed with 10 and 30 mL.min<sup>-1</sup>  
355 of headspace N<sub>2</sub> flushing at 12 and 30 °C, respectively. The percentage of CO<sub>2</sub> in the outlet gas  
356 stream, the culture pH and the dissolved oxygen concentration in the broth were continuously  
357 monitored. The end of a batch cultivation cycle was automatically triggered when the percentage of  
358 CO<sub>2</sub> in the offgas decreased below 75 % and 10 % of the maximum value reached during that cycle  
359 for growth on diluted wort and full-strength wort, respectively. These CO<sub>2</sub> percentages correspond to  
360 the moment at which sugar utilisation was complete in the first batch cycle for each condition, as  
361 determined by HPLC measurements. When the CO<sub>2</sub> threshold was reached, the reactor was emptied  
362 while stirring at 1200 RPM leaving about 7 mL to inoculate the next batch. Upon addition of fresh  
363 medium, the broth was stirred at 500 RPM and sparged with 500 mL.min<sup>-1</sup> of pressurized air during 5

364 min for diluted wort or 12 h for wort. During the remainder of each batch cultivation cycle, the  
365 medium was not sparged or stirred and the pH was not adjusted. LG30.1 and LG30.2 were carried out  
366 for 116 and 117 cycles respectively, LG12.1 and LG12.2 were carried out for 29 cycles and HG12.1  
367 and HG12.2 were carried out for 13 and 16 cycles, respectively. Culture samples from all six reactors  
368 were then streaked on YPD plates and after three subsequent restreaks, frozen stock cultures of  
369 single colony isolates were prepared. By default, five isolates were obtained for each culture. For  
370 LG12.1 and LG30.1, two different colony morphologies were observed, therefore five elevated and  
371 conically-shaped colonies and five regular flat colonies were stocked. The experiments at 12 °C on  
372 diluted wort were continued for four months until a total of 58 and 57 cycles was reached for LG12.1  
373 and LG12.2, respectively, and five single-cell isolates were obtained for each reactor as described  
374 above.

#### 375 Genomic DNA extraction and whole genome sequencing

376 Yeast cultures were incubated in 500-mL shake-flasks containing 100 mL YPD at 30°C on an orbital  
377 shaker set at 200 RPM until the strains reached stationary phase at an  $OD_{660}$  between 12 and 20.  
378 Genomic DNA was isolated using the Qiagen 100/G kit (Qiagen, Hilden, Germany) according to the  
379 manufacturer's instructions and quantified using a Qubit® Fluorometer 2.0 (ThermoFisher Scientific).  
380 For IMS0408 and the evolved isolates, genomic DNA was sequenced at Novogene Bioinformatics  
381 Technology Co., Ltd (Yuen Long, Hong Kong) on a HiSeq2500 sequencer (Illumina, San Diego, CA) with  
382 150 bp paired-end reads using PCR-free library preparation.

#### 383 Genome analysis

384 A high quality reference genome was constructed by combining near-complete assemblies of *S.*  
385 *cerevisiae* CEN.PK113-7D (Salazar, et al. 2017) and *S. eubayanus* CBS12357<sup>T</sup> (Brickwedde, et al. 2018).  
386 The kanMX marker present in IMS0408 was inserted as an additional contig (Wach, et al. 1994). For  
387 each evolved strain, raw Illumina reads were aligned against the reference genome using the  
388 Burrows–Wheeler Alignment tool (BWA, version 0.7.15-r1142) and further processed using SAMtools  
389 (version 1.3.1) and Pilon (version 1.18) for variant calling (Li, et al. 2009; Li and Durbin 2010; Walker,



390 et al. 2014). SNPs and INDELS that were also called or which were ambiguous in IMS0408, were  
391 disregarded. Copy number was determined based on read coverage analysis. Chromosomal  
392 translocations were detected using Breakdancer (version 1.3.6) (Chen, et al. 2009). Only  
393 translocations which were supported by at least 10 % of the reads aligned at that locus and which  
394 were absent in strain IMS0408 were considered. All SNPs, INDELS, recombinations and copy number  
395 changes were manually confirmed by visualising the generated .bam files in the Integrative Genomics  
396 Viewer (IGV) software (Robinson, et al. 2011). A complete list of identified mutations is provided in  
397 Supplementary Data File 1. For chimeric open-reading-frame reconstruction, reads aligning within 3  
398 kbp of an identified recombination site and their paired reads were extracted using Python and were  
399 assembled using SPAdes (Bankevich, et al. 2012). The resulting contigs were aligned against ORFs of  
400 genes the genes affected by the recombination to identify the recombination point, and the  
401 complete recombined ORF was reconstructed. Original and recombined ORFs were then aligned and  
402 translated using CloneManager (version 9.51, Sci-Ed Software, Denver, CO) to determine whether the  
403 translocation had introduced frameshifts or premature stop codons.

404 DNA content determination by flow cytometric analysis.

405 Exponential-phase shake flask cultures on YPD were diluted to an  $OD_{660}$  of 1. A 1 mL sample  
406 (approximately  $10^7$  cells) was then washed in cold demineralized water and resuspended in 800  $\mu$ L 70  
407 % ethanol while vortexing. After addition of another 800  $\mu$ L 70 % ethanol, fixed cells were stored at 4  
408 °C until further staining and analysis. DNA was then stained with SYTOX Green as described  
409 previously (Haase and Reed 2002). Samples were analysed on a Accuri C6 flow cytometer (BD  
410 Biosciences, Franklin Lakes, NJ) equipped with a 488-nm laser and the median fluorescence of cells in  
411 the 1n and 2n phases of the cell cycle was determined using FlowJo (BD Biosciences). The 1n and 2n  
412 medians of strains CEN.PK113-7D (n), CEN.PK122 (2n) and FRY153 (3n) were used to create a  
413 standard curve of fluorescence versus genome size with a linear curve fit, as performed previously  
414 (Van den Broek, et al. 2015). The genome size of each tested strain was estimated by averaging  
415 predicted genome sizes of the 1n and 2n population in assays on three independent cultures.

416 Identification of strains with respiratory deficiency

417 Respiratory competence was assessed through their ability to grow on ethanol. Samples from 24 h  
418 shake-flask cultures on YPD (30 °C, 200 RPM ) were washed twice with demineralized water and used  
419 to inoculate duplicate aerobic shake flasks containing 100 mL of SM with 2 % ethanol to an OD<sub>660</sub> of  
420 0.2. After 72 h incubation at 30 °C and 200 RPM, OD<sub>660</sub> was measured.

421 Assay for calcium-dependence of flocculation

422 Two 100 µL aliquots from overnight cultures on YPD were washed with sterile demineralized water.  
423 One aliquot was resuspended in demineralized water and the other in 50 mM EDTA (pH 7.0). Both  
424 samples were imaged at 100 x magnification under a Z1 microscope (Carl Zeiss BV, Breda, the  
425 Netherlands) to assess flocculence and its reversal by EDTA chelation of calcium ions.

426 Plasmid construction

427 All plasmids were propagated in *E. coli* DH5α (Table 3). Plasmid pUD711 and pUD712 were designed  
428 as previously described (Gorter de Vries, de Groot, et al. 2017) and de novo synthesised at GeneArt  
429 (ThermoFisher Scientific) containing the sequence 5'  
430 GGTCTCGCAAATAACAAGTATGAGTCCGTGAGGACGAAACGAGTAAGCTCGTCTTGTATAGTCACGGATCG  
431 AGTTTTAGAGCTAGAAATAGCAAGTTAAAATAAGGCTAGTCCGTTATCAACTTGAAAAAGTGGCACCGAGTCG  
432 GTGCTTTTGGCCGGCATGGTCCCAGCCTCCTCGCTGGCGCCGGCTGGGCAACATGCTTCGGCATGGCGAATGG  
433 GACACAGGCAAATTCATCTGATGAGTCCGTGAGGACGAAACGAGTAAGCTCGTCATGAATATCGCATTTTGT  
434 GGGTTTTAGAGCTAGAAATAGCAAGTTAAAATAAGGCTAGTCCGTTATCAACTTGAAAAAGTGGCACCGAGTC  
435 GGTGCTTTTGGCCGGCATGGTCCCAGCCTCCTCGCTGGCGCCGGCTGGGCAACATGCTTCGGCATGGCGAATG  
436 GGACACAGCGAGACC 3' for pUD711 and 5'  
437 GGTCTCGCAAATAACAAGTATGAGTCCGTGAGGACGAAACGAGTAAGCTCGTCTTGTATAGTCACGGATCG  
438 AGTTTTAGAGCTAGAAATAGCAAGTTAAAATAAGGCTAGTCCGTTATCAACTTGAAAAAGTGGCACCGAGTCG  
439 GTGCTTTTGGCCGGCATGGTCCCAGCCTCCTCGCTGGCGCCGGCTGGGCAACATGCTTCGGCATGGCGAATGG  
440 GACACAGCGAGACC 3' for pUD712. Plasmid pUDP104, expressing gRNA<sub>ScsFL1</sub> and *cas9*, was  
441 constructed by Golden Gate cloning by digesting pUDP004 and pUD711 using *BsaI* and ligating with  
442 T4 ligase (Engler, et al. 2008). Similarly, plasmid pUDP105, expressing gRNA<sub>SeSFL1</sub> and *cas9*, was

443 constructed from pUDP004 and pUD712. Correct assembly was verified by restriction analysis using  
444 Pdml.

445 Strain construction

446 The *ScTEF1p-Venus-ScENO2t* repair fragment with flanks for homologous recombination in the  
447 *ScMAL11* locus was PCR amplified from plasmid pUDE481 using primers 12989 and 12990 (Table 4).

448 The *ScTDH3p-mTurquoise2-ScADH1t* repair fragment with flanks for homologous recombination in  
449 the *ScSFL1* locus was PCR amplified from plasmid pUDE482 using primers 13564 and 13565. The

450 *ScTEF1p-Venus-ScENO2t* repair fragment with flanks for homologous recombination in the *SeSFL1*

451 locus was PCR amplified from plasmid pUDE481 using primers 13566 and 13567.

452 **Table 4: Primers used in this study.**

| name  | Sequence (3' to 5')                                                                  | Purpose                                |
|-------|--------------------------------------------------------------------------------------|----------------------------------------|
| 12989 | TTGGTGTTTCTTTCTGATGCTACATAGAAGAACATCAAACAACATAAAAAATAGTATAATACACACT<br>GGCTTAAGATGAC | Insertion Venus in <i>MAL11</i>        |
| 12990 | TTGGGAGCAGTCAAAGGATTCTTATTCTTCCAAAAAACAACCCCTTTACCGTCTCA<br>TGCTCAGC                 | Insertion Venus in <i>MAL11</i>        |
| 13564 | ACTTTTTCAGCTAGCAAGAAGGATCTCTTTTTAAACTCTATACAGGTGCACACAAAGGACCAGAT<br>GTCAACACAGCTAC  | Insertion mTurquoise2 in <i>ScSFL1</i> |
| 13565 | CGGAGTTGGTAAAAATATAGTTATAATCACAAGGATCAGGAGGAAAAAGAAAAAAGTGATTTAT<br>CGTCTCACATCCAGC  | Insertion mTurquoise2 in <i>ScSFL1</i> |
| 13566 | GTAAGAAAGCAGAAAAAAGAGAAAAAAGAAACGATCTCGACTAGAGTGACGGGTTGACACA<br>CTGGCTTAAGATGAC     | Insertion Venus in <i>SeSFL1</i>       |
| 13567 | AAAATGGAAGGGTAAAAATGGAAGGAAGAAGTGAAAGTGAAAAATGAAAAATACAATGTCGTC<br>TCATGCTCAGC       | Insertion Venus in <i>SeSFL1</i>       |

453

454 All strains were transformed by electroporation as described previously, with 300 ng of gRNA/Cas9

455 expression plasmid and 1 µg of repair fragment (Gorter de Vries, de Groot, et al. 2017). Strains

456 IMX1698 (mVenus::Δ*ScMAL11*), IMX1824 (mTurquoise2::Δ*ScSFL1*) and IMX1825 (Venus::Δ*SeSFL1*)

457 were constructed by transforming IMS0408 with the appropriate repair fragments and plasmids

458 pUDP045, pUDP104 and pUDP105, respectively. Strain IMX1826 (mTurquoise2::Δ*ScSFL1*

459 Venus::Δ*SeSFL1*) was constructed by transforming IMX1824 using the appropriate repair fragment

460 and plasmid pUDP105. After electroporation, cells were transferred to 20 mL SM-Ac medium to

461 select successful transformants and incubated at 30 °C for 3 to 5 days. After growth was observed,

462 200 µL of culture was transferred to 20 mL fresh SM-Ac and incubated similarly during 24h. Finally,

463 200 µL from the second culture was transferred to 20 mL fresh YPD medium to maximize expression

464 of fluorescent proteins. Successfully gene-edited cells were sorted using the BD FACSAria™ II SORP  
465 Cell Sorter (BD Biosciences) as described previously (Gorter de Vries, et al. 2018). The plasmids were  
466 cured from strains IMX1698, IMX1824, IMX1825 and IMX1826 by subsequent growth on YPD and  
467 plating on SM-FAC. After confirmation of the correct genotype by colony PCR, randomly picked  
468 colonies were used to prepare frozen stocks.

#### 469 Biomass sedimentation assay

470 IMS0408, IMS0556, IMS0558, IMS0559, IMS0617, IMX1824, IMX1825 and IMX1826 were grown in  
471 triplicate during 72h in vented 50 mL Bio-One Cellstar Cellreactor tubes (Sigma-Aldrich) on 20 mL YPD  
472 at 30 °C and 200 RPM until stationary phase. For each sample, the biomass was resuspended by  
473 vigorous vortexing and 1 mL was sampled immediately after vortexing from right underneath the  
474 meniscus. After 60 s of stationary incubation, another sample was taken by the same procedure.  
475 Biomass sedimentation was quantified as the ratio of the OD<sub>660</sub> values of the two samples.

#### 476 Evaluation of maltotriose fermentation

477 Each strain was grown microaerobically in 100 mL serum bottles containing 100 mL medium and  
478 shaken at 200 RPM. Medium (full-strength or diluted wort) and incubation temperature (12 °C or 30  
479 °C) were the same as in the evolution experiment from which a strain had been isolated. Strain  
480 IMS0408 was included as a control for each condition. Bottles were inoculated to an OD<sub>660</sub> of 0.2  
481 from aerobic shake-flask precultures grown on same medium and under the same conditions. During  
482 cultivation, 8 to 12 samples were taken at regular intervals for OD<sub>660</sub> measurements and metabolite  
483 analysis by HPLC. When no further sugar consumption was recorded over an interval of at least 48h,  
484 the fermentation was considered finished.

## 485 **Acknowledgments and funding information**

486 The sequencing data are available at NCBI (<https://www.ncbi.nlm.nih.gov/>) under the Bioproject  
487 PRJNA506072. We thank Erik de Hulster, Xavier Hakkaart and Robert Mans for sharing their expertise  
488 in fermentation, Marijke Luttik for her expertise in Flow cytometry and Nikola Gyurchev for  
489 assembling plasmids pUDP104 and pUDP105. We are thankful to Niels Kuijpers (Heineken Supply  
490 Chain B.V.), and Jan-Maarten Geertman (Heineken Supply Chain B.V.) for their support and for  
491 critically reading the manuscript. This work was performed within the BE-Basic R&D Program  
492 (<http://www.be-basic.org/>), which was granted an FES subsidy from the Dutch Ministry of Economic  
493 Affairs, Agriculture and Innovation (EL&I).

## 494 **Author contributions**

495 ARGdV planned and executed the laboratory evolution, made single colony isolates, prepared  
496 genomic DNA and characterised ploidy and respiratory deficiency. ARGdV, ACAvA and LHK  
497 characterised flocculation and maltotriose utilisation of the isolates. ARGdV and MAV performed the  
498 reverse engineering of deletions of *SFL1* and *MAL11* and characterized the reverse engineered  
499 phenotypes. ARGdV and MvdB performed the bioinformatics analysis. ARGdV, JTP and JMGD wrote  
500 the manuscript. AS, NB and TA provided critical feedback throughout the study. JMGD and JTP  
501 supervised the study. All authors read and approved the final manuscript.

## 502 **Disclosure declaration**

503 The authors declare no competing financial interests.

## 504 References

- 505 Alves SL, Herberts RA, Hollatz C, Trichez D, Miletti LC, De Araujo PS, Stambuk BU. 2008. Molecular  
506 analysis of maltotriose active transport and fermentation by *Saccharomyces cerevisiae* reveals a  
507 determinant role for the *AGT1* permease. *Appl. Environ. Microbiol.* 74:1494-1501.
- 508 Andreasen AA, Stier T. 1953. Anaerobic nutrition of *Saccharomyces cerevisiae*. I. Ergosterol  
509 requirement for growth in a defined medium. *J Cell. Comp. Physiol.* 41:23-36.
- 510 Atsushi F, Yoshiko K, Satoru K, Yoshio M, Shinichi M, Harumi K. 1989. Domains of the SFL1 protein of  
511 yeasts are homologous to Myc oncoproteins or yeast heat-shock transcription factor. *Gene* 85:321-  
512 328.
- 513 Bachmann H, Pronk JT, Kleerebezem M, Teusink B. 2015. Evolutionary engineering to enhance starter  
514 culture performance in food fermentations. *Curr. Opin. Biotechnol.* 32:1-7.
- 515 Bachmann H, Starrenburg MJ, Molenaar D, Kleerebezem M, van Hylckama Vlieg JE. 2012. Microbial  
516 domestication signatures of *Lactococcus lactis* can be reproduced by experimental evolution.  
517 *Genome Res.* 22:115-124.
- 518 Bankevich A, Nurk S, Antipov D, Gurevich AA, Dvorkin M, Kulikov AS, Lesin VM, Nikolenko SI, Pham S,  
519 Pribelski AD. 2012. SPAdes: a new genome assembly algorithm and its applications to single-cell  
520 sequencing. *J. Comput. Biol.* 19:455-477.
- 521 Bellon JR, Eglinton JM, Siebert TE, Pollnitz AP, Rose L, de Barros Lopes M, Chambers PJ. 2011. Newly  
522 generated interspecific wine yeast hybrids introduce flavour and aroma diversity to wines. *Appl.*  
523 *Microbiol. Biotechnol.* 91:603-612.
- 524 Botstein D, Chervitz SA, Cherry M. 1997. Yeast as a model organism. *Science* 277:1259-1260.
- 525 Brickwedde A, Brouwers N, van den Broek M, Gallego Murillo JS, Fraiture JL, Pronk JT, Daran J-MG.  
526 2018. Structural, physiological and regulatory analysis of maltose transporter genes in  
527 *Saccharomyces eubayanus* CBS 12357<sup>T</sup>. *Front. Microbiol.* 9:1786.
- 528 Brickwedde A, van den Broek M, Geertman J-MA, Magalhães F, Kuijpers NGA, Gibson B, Pronk JT,  
529 Daran J-MG. 2017. Evolutionary engineering in chemostat cultures for improved maltotriose  
530 fermentation kinetics in *Saccharomyces pastorianus* lager brewing yeast. *Front. Microbiol.* 8:1690.
- 531 Briggs DE, Brookes P, Stevens R, Boulton C. 2004. *Brewing: science and practice*: Elsevier.
- 532 Brouwers N, Gorter de Vries AR, van den Broek M, Weening SM, Schuurman TDE, Kuijpers NGA,  
533 Pronk JT, Daran J-MG. 2018. In vivo recombination of *Saccharomyces eubayanus* maltose-transporter  
534 genes yields a chimeric transporter that enables maltotriose fermentation. bioRxiv:428839.
- 535 Chambers SR, Hunter N, Louis EJ, Borts RH. 1996. The mismatch repair system reduces meiotic  
536 homeologous recombination and stimulates recombination-dependent chromosome loss. *Mol. Cell*  
537 *Biol.* 16:6110-6120.
- 538 Chen K, Wallis JW, McLellan MD, Larson DE, Kalicki JM, Pohl CS, McGrath SD, Wendl MC, Zhang Q,  
539 Locke DP. 2009. BreakDancer: an algorithm for high-resolution mapping of genomic structural  
540 variation. *Nat. Methods* 6:677.
- 541 Coloretti F, Zambonelli C, Tini V. 2006. Characterization of flocculent *Saccharomyces* interspecific  
542 hybrids for the production of sparkling wines. *Food Microbiol.* 23:672-676.

- 543 Delneri D, Colson I, Grammenoudi S, Roberts IN, Louis EJ, Oliver SG. 2003. Engineering evolution to  
544 study speciation in yeasts. *Nature* 422:68.
- 545 Dietvorst J, Londesborough J, Steensma H. 2005. Maltotriose utilization in lager yeast strains: *MTT1*  
546 encodes a maltotriose transporter. *Yeast* 22:775-788.
- 547 Dunham MJ, Badrane H, Ferea T, Adams J, Brown PO, Rosenzweig F, Botstein D. 2002. Characteristic  
548 genome rearrangements in experimental evolution of *Saccharomyces cerevisiae*. *Proc. Natl. Acad.*  
549 *Sci. U S A* 99:16144-16149.
- 550 Dunn B, Paulish T, Stanbery A, Piotrowski J, Koniges G, Kroll E, Louis EJ, Liti G, Sherlock G, Rosenzweig  
551 F. 2013. Recurrent rearrangement during adaptive evolution in an interspecific yeast hybrid suggests  
552 a model for rapid introgression. *PLoS Genet.* 9:e1003366.
- 553 Engler C, Kandzia R, Marillonnet S. 2008. A one pot, one step, precision cloning method with high  
554 throughput capability. *PLoS One* 3:e3647.
- 555 Ferreira I, Pinho O, Vieira E, Tavela J. 2010. Brewer's *Saccharomyces* yeast biomass: characteristics  
556 and potential applications. *Trends Food Sci. Technol.* 21:77-84.
- 557 Fontdevila A. 2005. Hybrid genome evolution by transposition. *Cytogenet. Genome Res.* 110:49-55.
- 558 Gibbons JG, Rinker DC. 2015. The genomics of microbial domestication in the fermented food  
559 environment. *Curr. Opin. Genet. Dev.* 35:1-8.
- 560 Gibbons JG, Salichos L, Slot JC, Rinker DC, McGary KL, King JG, Klich MA, Tabb DL, McDonald WH,  
561 Rokas A. 2012. The evolutionary imprint of domestication on genome variation and function of the  
562 filamentous fungus *Aspergillus oryzae*. *Curr. Biol.* 22:1403-1409.
- 563 Gibson B, Liti G. 2015. *Saccharomyces pastorianus*: genomic insights inspiring innovation for industry.  
564 *Yeast* 32:17-27.
- 565 Gibson B, Prescott K, Smart K. 2008. Petite mutation in aged and oxidatively stressed ale and lager  
566 brewing yeast. *Let. Appl. Microbiol.* 46:636-642.
- 567 Gibson BR, Lawrence SJ, Leclaire JP, Powell CD, Smart KA. 2007. Yeast responses to stresses  
568 associated with industrial brewery handling. *FEMS Microbiol. Lett.* 31:535-569.
- 569 Gibson BR, Storgårds E, Krogerus K, Vidgren V. 2013. Comparative physiology and fermentation  
570 performance of Saaz and Froberg lager yeast strains and the parental species *Saccharomyces*  
571 *eubayanus*. *Yeast* 30:255-266.
- 572 González-Ramos D, Gorter de Vries AR, Grijseels SS, Berkum MC, Swinnen S, Broek M, Nevoigt E,  
573 Daran J-MG, Pronk JT, Maris AJA. 2016. A new laboratory evolution approach to select for  
574 constitutive acetic acid tolerance in *Saccharomyces cerevisiae* and identification of causal mutations.  
575 *Biotechnol. Biofuels* 9:173.
- 576 González SS, Barrio E, Gafner J, Querol A. 2006. Natural hybrids from *Saccharomyces cerevisiae*,  
577 *Saccharomyces bayanus* and *Saccharomyces kudriavzevii* in wine fermentations. *FEMS Yeast Res.*  
578 6:1221-1234.
- 579 Gorter de Vries AR, Couwenberg LGF, van den Broek M, de la Torre Cortes P, ter Horst J, Pronk JT,  
580 Daran J-MG. 2018. Allele-specific genome editing using CRISPR-Cas9 causes off-target mutations in  
581 diploid yeast. *bioRxiv*:397984.



- 582 Gorter de Vries AR, de Groot PA, van den Broek M, Daran J-MG. 2017. CRISPR-Cas9 mediated gene  
583 deletions in lager yeast *Saccharomyces pastorianus*. *Microb. Cell Fact.* 16:222.
- 584 Gorter de Vries AR, Pronk JT, Daran J-MG. 2017. Industrial relevance of chromosomal copy number  
585 variation in *Saccharomyces yeasts*. *Appl. Environ. Microbiol.* 83:e03206-03216.
- 586 Haase SB, Reed SI. 2002. Improved flow cytometric analysis of the budding yeast cell cycle. *Cell cycle*  
587 1:117-121.
- 588 Hebly M, Brickwedde A, Bolat I, Driessen MRM, de Hulster EAF, van den Broek M, Pronk JT,  
589 Geertman J-M, Daran J-MG, Daran-Lapujade P. 2015. *S. cerevisiae* × *S. eubayanus* interspecific hybrid,  
590 the best of both worlds and beyond. *FEMS Yeast Res.* 15:fov005.
- 591 Hewitt SK, Donaldson IJ, Lovell SC, Delneri D. 2014. Sequencing and characterisation of  
592 rearrangements in three *S. pastorianus* strains reveals the presence of chimeric genes and gives  
593 evidence of breakpoint reuse. *PLoS One* 9:e92203.
- 594 Hittinger CT. 2013. *Saccharomyces* diversity and evolution: a budding model genus. *Trends Genet.*  
595 29:309-317.
- 596 Hope EA, Amorosi CJ, Miller AW, Dang K, Heil CS, Dunham MJ. 2017. Experimental evolution reveals  
597 favored adaptive routes to cell aggregation in yeast. *Genetics:genetics.* 116.198895.
- 598 Ibeas JI, Jimenez J. 1997. Mitochondrial DNA loss caused by ethanol in *Saccharomyces* flor yeasts.  
599 *Appl. Environ. Microbiol.* 63:7-12.
- 600 Jansen ML, Daran-Lapujade P, de Winde JH, Piper MD, Pronk JT. 2004. Prolonged maltose-limited  
601 cultivation of *Saccharomyces cerevisiae* selects for cells with improved maltose affinity and  
602 hypersensitivity. *Appl. Environ. Microbiol.* 70:1956-1963.
- 603 Krogerus K, Magalhães F, Vidgren V, Gibson B. 2017. Novel brewing yeast hybrids: creation and  
604 application. *Appl. Microbiol. Biotechnol.* 101:65-78.
- 605 Lancaster SM, Payen C, Heil CS, Dunham MJ. 2018. Fitness benefits of loss of heterozygosity in  
606 *Saccharomyces* hybrids. *bioRxiv:452748*.
- 607 Lang GI, Murray AW. 2008. Estimating the per-base-pair mutation rate in the yeast *Saccharomyces*  
608 *cerevisiae*. *Genetics* 178:67-82.
- 609 Li H, Durbin R. 2010. Fast and accurate long-read alignment with Burrows–Wheeler transform.  
610 *Bioinformatics* 26:589-595.
- 611 Li H, Handsaker B, Wysoker A, Fennell T, Ruan J, Homer N, Marth G, Abecasis G, Durbin R. 2009. The  
612 sequence alignment/map format and SAMtools. *Bioinformatics* 25:2078-2079.
- 613 Libkind D, Hittinger CT, Valério E, Gonçalves C, Dover J, Johnston M, Gonçalves P, Sampaio JP. 2011.  
614 Microbe domestication and the identification of the wild genetic stock of lager-brewing yeast. *Proc.*  
615 *Natl. Acad. Sci. U S A* 108:14539-14544.
- 616 Liti G, Barton DB, Louis EJ. 2006. Sequence diversity, reproductive isolation and species concepts in  
617 *Saccharomyces*. *Genetics* 174:839-850.
- 618 Lopandic K, Pfliegler WP, Tiefenbrunner W, Gangl H, Sipiczki M, Sterflinger K. 2016. Genotypic and  
619 phenotypic evolution of yeast interspecies hybrids during high-sugar fermentation. *Appl. Microbiol.*  
620 *Biotechnol.* 100:6331-6343.



- 621 Magwene PM, Kayıkcı Ö, Graneck JA, Reininga JM, Scholl Z, Murray D. 2011. Outcrossing, mitotic  
622 recombination, and life-history trade-offs shape genome evolution in *Saccharomyces cerevisiae*.  
623 Proc. Natl. Acad. Sci. U S A 108:1987-1992.
- 624 Marsit S, Dequin S. 2015. Diversity and adaptive evolution of *Saccharomyces* wine yeast: a review.  
625 FEMS Yeast Res. 15:fov067-fov067.
- 626 Meussdoerffer FG. 2009. A comprehensive history of beer brewing. Handbook of brewing: Processes,  
627 technology, markets:1-42.
- 628 Monerawela C, Bond U. 2018. The hybrid genomes of *Saccharomyces pastorianus*: A current  
629 perspective. Yeast 35:39-50.
- 630 Monerawela C, Bond U. 2017. Recombination sites on hybrid chromosomes in *Saccharomyces*  
631 *pastorianus* share common sequence motifs and define a complex evolutionary relationship between  
632 group I and II lager yeasts. FEMS Yeast Res. 17:fox047-fox047.
- 633 Naseeb S, James SA, Alsammar H, Michaels CJ, Gini B, Nueno-Palop C, Bond CJ, McGhie H, Roberts IN,  
634 Delneri D. 2017. *Saccharomyces jurei* sp nov., isolation and genetic identification of a novel yeast  
635 species from *Quercus robur*. Int. J. Syst. Evol. Microbiol. 67:2046-2052.
- 636 Naumov G, Nguyen H-V, Naumova ES, Michel A, Aigle M, Gaillardin C. 2001. Genetic identification of  
637 *Saccharomyces bayanus* var. *uvarum*, a cider-fermenting yeast. Int. J. Food Microbiol. 65:163-171.
- 638 Newlon C, Lipchitz L, Collins I, Deshpande A, Devenish R, Green R, Klein H, Palzkill T, Ren R, Synn S.  
639 1991. Analysis of a circular derivative of *Saccharomyces cerevisiae* chromosome III: a physical map  
640 and identification and location of ARS elements. Genetics 129:343-357.
- 641 Nijkamp JF, van den Broek M, Datema E, de Kok S, Bosman L, Luttik MA, Daran-Lapujade P,  
642 Vongsangnak W, Nielsen J, Heijne WH. 2012. De novo sequencing, assembly and analysis of the  
643 genome of the laboratory strain *Saccharomyces cerevisiae* CEN. PK113-7D, a model for modern  
644 industrial biotechnology. Microb. Cell Fact. 11:36.
- 645 Nikulin J, Krogerus K, Gibson B. 2017. Alternative *Saccharomyces* interspecies hybrid combinations  
646 and their potential for low-temperature wort fermentation. Yeast.
- 647 Okuno M, Kajitani R, Ryusui R, Morimoto H, Kodama Y, Itoh T. 2016. Next-generation sequencing  
648 analysis of lager brewing yeast strains reveals the evolutionary history of interspecies hybridization.  
649 DNA Res. 23:67-80.
- 650 Oud B, Guadalupe-Medina V, Nijkamp JF, de Ridder D, Pronk JT, van Maris AJ, Daran J-M. 2013.  
651 Genome duplication and mutations in *ACE2* cause multicellular, fast-sedimenting phenotypes in  
652 evolved *Saccharomyces cerevisiae*. Proc. Natl. Acad. Sci. U S A:201305949.
- 653 Pérez Través L, Lopes CA, Barrio Esparducer E, Querol Simón A. 2014. Stabilization process in  
654 *Saccharomyces* intra and interspecific hybrids in fermentative conditions. Int. Microbiol.
- 655 Peris D, Moriarty RV, Alexander WG, Baker E, Sylvester K, Sardi M, Langdon QK, Libkind D, Wang Q-  
656 M, Bai F-Y. 2017. Hybridization and adaptive evolution of diverse *Saccharomyces* species for cellulosic  
657 biofuel production. Biotechnol. Biofuels 10:78.
- 658 Piatkowska EM, Naseeb S, Knight D, Delneri D. 2013. Chimeric protein complexes in hybrid species  
659 generate novel phenotypes. PLoS Genet. 9:e1003836.

- 660 Postma E, Verduyn C, Kuiper A, Scheffers WA, Van Dijken JP. 1990. Substrate-accelerated death of  
661 *Saccharomyces cerevisiae* CBS 8066 under maltose stress. *Yeast* 6:149-158.
- 662 Querol A, Bond U. 2009. The complex and dynamic genomes of industrial yeasts. *FEMS Microbiol.*  
663 *Lett.* 293:1-10.
- 664 Robinson JT, Thorvaldsdóttir H, Winckler W, Guttman M, Lander ES, Getz G, Mesirov JP. 2011.  
665 Integrative genomics viewer. *Nat. Biotechnol.* 29:24.
- 666 Salazar AN, Gorter de Vries AR, van den Broek M, Wijsman M, de la Torre Cortés P, Brickwedde A,  
667 Brouwers N, Daran J-MG, Abeel T. 2017. Nanopore sequencing enables near-complete de novo  
668 assembly of *Saccharomyces cerevisiae* reference strain CEN. PK113-7D. *FEMS Yeast Res.* 17.
- 669 Salema-Oom M, Pinto VV, Gonçalves P, Spencer-Martins I. 2005. Maltotriose utilization by industrial  
670 *Saccharomyces* strains: characterization of a new member of the  $\alpha$ -glucoside transporter family.  
671 *Appl. Environ. Microbiol.* 71:5044-5049.
- 672 Santaguida S, Amon A. 2015. Short-and long-term effects of chromosome mis-segregation and  
673 aneuploidy. *Nat. Rev. Mol. Cell. Biol.* 16:473.
- 674 Sheltzer JM, Blank HM, Pfau SJ, Tange Y, George BM, Humpton TJ, Brito IL, Hiraoka Y, Niwa O, Amon  
675 A. 2011. Aneuploidy drives genomic instability in yeast. *Science* 333:1026-1030.
- 676 Sipiczki M. 2008. Interspecies hybridization and recombination in *Saccharomyces* wine yeasts. *FEMS*  
677 *Yeast Res.* 8:996-1007.
- 678 Smukowski Heil CS, DeSevo CG, Pai DA, Tucker CM, Hoang ML, Dunham MJ. 2017. Loss of  
679 heterozygosity drives adaptation in hybrid yeast. *Mol. Biol. Evol.* 34:1596-1612.
- 680 Smukowski Heil CS, Large CR, Patterson K, Dunham MJ. 2018. Temperature preference biases  
681 parental genome retention during hybrid evolution. [bioRxiv:429803](https://doi.org/10.1101/429803).
- 682 Solis-Escalante D, Kuijpers NGA, Nadine B, Bolat I, Bosman L, Pronk JT, Daran J-MG, Pascale D-L. 2013.  
683 amdSYM, a new dominant recyclable marker cassette for *Saccharomyces cerevisiae*. *FEMS Yeast Res.*  
684 13:126-139.
- 685 Steensels J, Snoek T, Meersman E, Nicolino MP, Voordeckers K, Verstrepen KJ. 2014. Improving  
686 industrial yeast strains: exploiting natural and artificial diversity. *FEMS microbiology reviews* 38:947-  
687 995.
- 688 Storchova Z. 2014. Ploidy changes and genome stability in yeast. *Yeast* 31:421-430.
- 689 Tanaka K, Lin BK, Wood DR, Tamanoi F. 1991. *IRA2*, an upstream negative regulator of *RAS* in yeast, is  
690 a *RAS* GTPase-activating protein. *Proc. Natl. Acad. Sci. U S A* 88:468-472.
- 691 Tanaka K, Nakafuku M, Satoh T, Marshall MS, Gibbs JB, Matsumoto K, Kaziro Y, Toh-e A. 1990. *S.*  
692 *cerevisiae* genes *IRA1* and *IRA2* encode proteins that may be functionally equivalent to mammalian  
693 ras GTPase activating protein. *Cell* 60:803-807.
- 694 Taylor DR, Zeyl C, Cooke E. 2002. Conflicting levels of selection in the accumulation of mitochondrial  
695 defects in *Saccharomyces cerevisiae*. *Proc. Natl. Acad. Sci. U S A* 99:3690-3694.
- 696 Thomas BJ, Rothstein R. 1989. Elevated recombination rates in transcriptionally active DNA. *Cell*  
697 56:619-630.

- 698 Torres EM, Dephoure N, Panneerselvam A, Tucker CM, Whittaker CA, Gygi SP, Dunham MJ, Amon A.  
699 2010. Identification of aneuploidy-tolerating mutations. *Cell* 143:71-83.
- 700 Torres EM, Sokolsky T, Tucker CM, Chan LY, Boselli M, Dunham MJ, Amon A. 2007. Effects of  
701 aneuploidy on cellular physiology and cell division in haploid yeast. *Science* 317:916-924.
- 702 Van den Broek M, Bolat I, Nijkamp JF, Ramos E, Luttik MAH, Koopman F, Geertman J-M, De Ridder D,  
703 Pronk J, Daran J-MG. 2015. Chromosomal copy number variation in *Saccharomyces pastorianus* is  
704 evidence for extensive genome dynamics in industrial lager brewing strains. *Appl. Environ. Microbiol.*  
705 81:6253-6267.
- 706 Verduyn C, Postma E, Scheffers WA, Van Dijken JP. 1992. Effect of benzoic acid on metabolic fluxes in  
707 yeasts: a continuous-culture study on the regulation of respiration and alcoholic fermentation. *Yeast*  
708 8:501-517.
- 709 Verhoeven MD, de Valk SC, Daran J-MG, van Maris AJ, Pronk JT. 2018. Fermentation of glucose-  
710 xylose-arabinose mixtures by a synthetic consortium of single-sugar-fermenting *Saccharomyces*  
711 *cerevisiae* strains. *FEMS Yeast Res.* 18:foy075.
- 712 Vidgren V. 2010. Maltose and maltotriose transport into ale and lager brewer's yeast strains. VTT  
713 publications.
- 714 Vidgren V, Huuskonen A, Virtanen H, Ruohonen L, Londesborough J. 2009. Improved fermentation  
715 performance of a lager yeast after repair of its *AGT1* maltose and maltotriose transporter genes.  
716 *Appl. Environ. Microbiol.* 75:2333-2345.
- 717 Voordeckers K, Kominek J, Das A, Espinosa-Cantú A, De Maeyer D, Arslan A, Van Pee M, van der  
718 Zande E, Meert W, Yang Y. 2015. Adaptation to high ethanol reveals complex evolutionary pathways.  
719 *PLoS Genet.* 11:e1005635.
- 720 Wach A, Brachat A, Pöhlmann R, Philippsen P. 1994. New heterologous modules for classical or PCR-  
721 based gene disruptions in *Saccharomyces cerevisiae*. *Yeast* 10:1793-1808.
- 722 Walker BJ, Abeel T, Shea T, Priest M, Abouelliel A, Sakthikumar S, Cuomo CA, Zeng Q, Wortman J,  
723 Young SK. 2014. Pilon: an integrated tool for comprehensive microbial variant detection and genome  
724 assembly improvement. *PLoS One* 9:e112963.
- 725 Walther A, Hesselbart A, Wendland J. 2014. Genome sequence of *Saccharomyces carlsbergensis*, the  
726 world's first pure culture lager yeast. *G3 (Bethesda)* 4:783-793.
- 727 Weiss CV, Roop JI, Hackley RK, Chuong JN, Grigoriev IV, Arkin AP, Skerker JM, Brem RB. 2018. Genetic  
728 dissection of interspecific differences in yeast thermotolerance. *Nat. Genet.*:1.
- 729 Wisselink HW, Toirkens MJ, Wu Q, Pronk JT, van Maris AJA. 2009. Novel evolutionary engineering  
730 approach for accelerated utilization of glucose, xylose, and arabinose mixtures by engineered  
731 *Saccharomyces cerevisiae* strains. *Appl. Environ. Microbiol.* 75:907-914.
- 732 Yona AH, Manor YS, Herbst RH, Romano GH, Mitchell A, Kupiec M, Pilpel Y, Dahan O. 2012.  
733 Chromosomal duplication is a transient evolutionary solution to stress. *Proc. Natl. Acad. Sci. U S A*  
734 109:21010-21015.
- 735
